# Supplementary material for: To which sites were thiols added? Insight into the thiol–yne click-based post-synthetic modification of conjugated microporous polymers
Source: Royal Society of Chemistry journal article supplement (doi:10.1039/d3py00227f), 2023-01-01

*Electronic Supplementary Information for*

**To which sites were thiols added? Insight on the thiol-yne click-based post-synthetic modification of conjugated microporous polymers**

June Young Jang,<sup>a</sup> Gye Hong Kim,<sup>b</sup> Yoon-Joo Ko,<sup>c</sup> Kyoung Chul Ko<sup>\*d</sup> and Seung Uk Son<sup>\*a</sup>

<sup>a</sup>Department of Chemistry, Sungkyunkwan University, Suwon 16419, Korea

<sup>b</sup>Department of Earth Systems and Environmental Sciences, Chonnam National University, Gwangju 61186, Korea

<sup>c</sup>Laboratory of Nuclear Magnetic Resonance, National Center for Inter-University Research Facilities (NCIRF),  
Seoul National University, Seoul 08826, Korea

<sup>d</sup>Department of Chemistry Education, Chonnam National University, Gwangju 61186, Korea

**Experimental Sections**

SEM and TEM images were obtained by JSM7100F and JEOL2100F, respectively, at the Chiral Material Core Facility Center of Sungkyunkwan University. Solid state <sup>13</sup>C NMR spectra were obtained at CP/TOSS mode by a 500 MHz Bruker ADVANCE II NMR spectrometer at the NCIRF of Seoul National University. IR spectra were obtained by a Bruker VERTEX 70 FT-IR spectrometer. Elemental analysis was conducted by a CE EA1110 analyzer. The N<sub>2</sub> adsorption-desorption isotherm curves were obtained by a Micromeritics ASAP2020. Pore size distribution diagrams were obtained by the DFT method. Powder XRD patterns were obtained by a Rigaku MAX-2200. Solution state <sup>1</sup>H and <sup>13</sup>C NMR spectra were obtained by a 500 MHz Varian spectrometer. High-resolution mass spectra were obtained by a JEOL JMS 700.

**Synthesis of H-CMP-1 and H-CMP-PT**

For the use of templates, silica spheres with an average diameter of 200 nm and a surface area of 20 m<sup>2</sup>/g were prepared by the Stöber method reported in the literature.<sup>1</sup> In this work, we applied the following synthetic procedures. Ethanol (200 mL), distilled water (8 mL), and ammonia solution (28% in water, 5 mL) were added to a 250 mL round bottomed flask. After stirring at room temperature for 30 min, tetraethyl orthosilicate (TEOS, 14 mL, 63 mmol) was added to the reaction mixture. After stirring at room temperature for 18 h, the reaction mixture was transferred to an Erlenmeyer flask. After adding hexane (200 mL) and methylene chloride (30 mL), the aggregated silica spheres were separated by centrifugation, washed with a mixture of methanol (20 mL) and acetone (20 mL) four times, and dried under vacuum.

For the preparation of SiO<sub>2</sub>@CMP-1, silica spheres (0.60 g), (PPh<sub>3</sub>)<sub>2</sub>PdCl<sub>2</sub> (28 mg, 40 μmol), and CuI (7.6 mg, 40 μmol) were added to a flame-dried Schlenk flask under argon. After distilled toluene (20 mL) and distilled triethylamine (40 mL) were added, the reaction mixture was sonicated at room temperature for 1 h under argon. After 1,3,5-triethynylbenzene (60 mg, 0.40 mmol) and 1,4-diiodobenzene (0.198 mg, 0.600 mmol) were added, the reaction mixture was stirred at 90°C for 12 h under argon. After being cooled to room temperature, solid (SiO<sub>2</sub>@CMP-1) was separated by centrifugation, washed with a mixture of methylene chloride (15 mL), methanol (15 mL), and acetone (15 mL) five times, and dried under vacuum. For the preparation of H-CMP-1,

SiO<sub>2</sub>@CMP-1 was added to a mixture of aqueous HF solution (48~51% in water, 7.5 mL), methanol (20 mL), and water (15 mL) in a 50 mL Falcon tube. After the reaction mixture was stirred at room temperature for 2 h, the solid (H-CMP-1) was separated by centrifugation, washed with a mixture of methanol (20 mL) and water (20 mL) five times and acetone (40 mL) three times, and dried under vacuum. *Caution: HF solution is extremely dangerous and toxic and thus, should be handled with specific gloves in a hood. After reaction, the excess HF solution should be quenched with NaOH solution.*

For the preparation of H-CMP-1-PT, H-CMP-1 (50 mg), azobis(isobutyronitrile) (AIBN, 0.43 g, 2.6 mmol), 1-propanethiol (0.24 mL, 2.6 mmol), and distilled toluene (16 mL) were added to a flame-dried Schlenk flask. The reaction mixture was stirred at 90°C for 24 h. After being cooled to room temperature, the solid (H-CMP-1-PT) was separated by centrifugation, washed with a mixture of methylene chloride (15 mL), methanol (15 mL), and acetone (15 mL) five times, and dried under vacuum.

#### ***Synthesis of H-CMP-Br and H-CMP-Br-PT***

For the synthesis of H-CMP-Br, the same synthetic procedures used for the H-CMP-1 were applied, except using 1,3,5-triethynylbenzene (60 mg, 0.40 mmol) and 1,4-dibromobenzene (94 mg, 0.40 mmol), instead of 1,3,5-triethynylbenzene (60 mg, 0.40 mmol) and 1,4-diiodobenzene (0.198 mg, 0.600 mmol). The other procedures are the same as those for H-CMP-1. For the synthesis of H-CMP-Br-PT, the same synthetic procedures used for the H-CMP-1-PT were applied, except using H-CMP-Br (50 mg), instead of H-CMP-1 (50 mg). The other procedures are the same as those for H-CMP-1-PT.

#### ***Synthesis of H-CMP-G and H-CMP-G-PT***

For the synthesis of H-CMP-G, the same synthetic procedures used for the H-CMP-1 were applied, except using 1,3,5-triethynylbenzene (60 mg, 0.40 mmol), instead of 1,3,5-triethynylbenzene (60 mg, 0.40 mmol) and 1,4-diiodobenzene (0.198 mg, 0.600 mmol). The other procedures are the same as those for H-CMP-1. For the synthesis of H-CMP-G-PT, the same synthetic procedures used for the H-CMP-1-PT were applied, except using H-CMP-G (50 mg), instead of H-CMP-1 (50 mg). The other procedures are the same as those for H-CMP-1-PT.

#### ***Experimental procedures of model studies***

For the single addition reaction<sup>2</sup> of 1-propanethiol to 1,2-diphenylacetylene, the same synthetic procedures used for the single addition reaction of 1-propanethiol to 1,4-diphenylbutadiyne were applied except using 1,2-diphenylacetylene instead of 1,4-diphenylbutadiyne (vide infra). The products are known compounds and their NMR spectra matched well with those in the literature.<sup>2</sup> Characterization data of (1,2-diphenylvinyl)(propyl)sulfane: Isolated yield: 87% (Z:E=57:43), a Z isomer, <sup>1</sup>H NMR (500 MHz, CDCl<sub>3</sub>) δ 7.73 (d, *J* = 8.1 Hz, 2H), 7.59 (d, *J* = 8.3 Hz, 2H), 7.42~7.03 (m, 6H), 6.79 (s, 1H), 2.39 (t, *J* = 7.3 Hz, 2H), 1.44 (sextet, 7.3 Hz, 2H), 0.81 (t, *J* = 7.3 Hz, 3H) ppm, an E isomer <sup>1</sup>H NMR (500 MHz, CDCl<sub>3</sub>) δ 7.42~7.03 (m, 8H), 6.92 (d, *J* = 7.8 Hz, 2H), 6.73 (s, 1H), 2.51 (t, *J* = 7.3 Hz, 2H), 1.60 (sextet, 7.3 Hz, 2H), 0.96 (d, *J* = 7.3

Hz, 3H) ppm,  $^{13}\text{C}$  NMR (125 MHz,  $\text{CDCl}_3$ )  $\delta$  = 141.3, 138.4, 138.2, 137.9, 137.2, 136.9, 132.0, 129.7, 129.6, 128.9, 128.6, 128.4, 128.3, 128.0, 127.8, 127.1, 126.7, 126.4, 34.8, 33.9, 23.2, 22.6, 13.4, 13.2 ppm.

For the possible coupling of bromobenzene with 1-propanethiol in the presence of  $(\text{PPh}_3)_2\text{PdCl}_2$  and  $\text{CuI}$ , bromobenzene (0.14 mL, 1.0 mmol), azobis(isobutyronitrile) (AIBN, 0.164 mg, 1.00 mmol), 1-propanethiol (0.093 mL, 1.0 mmol), and distilled toluene (2 mL) were added to a flame-dried Schlenk flask. The reaction mixture was stirred at  $90^\circ\text{C}$  for 24 h. After being cooled to room temperature, the solvent was evaporated by a rotary evaporator. The reaction mixture was analyzed by  $^1\text{H}$  NMR spectroscopy, showing no reaction of bromobenzene. When the possible coupling of bromobenzene with 1-propanethiol was conducted in the absence of  $(\text{PPh}_3)_2\text{PdCl}_2$  and  $\text{CuI}$ , no reaction was observed. When we used iodobenzene, instead of bromobenzene, no reactions were observed in the presence and absence of  $(\text{PPh}_3)_2\text{PdCl}_2$  and  $\text{CuI}$ .

For the double addition reaction<sup>3</sup> of 1-propanethiol to 1,4-diphenylbutadiyne, 1,4-diphenylbutadiyne (0.20 g, 1.0 mmol), azobis(isobutyronitrile) (AIBN, 0.657 mg, 4.00 mmol), 1-propanethiol (0.37 mL, 4.0 mmol), and distilled toluene (20 mL) were added to a flame-dried flask. The reaction mixture was stirred at  $90^\circ\text{C}$  for 24 h. After being cooled to room temperature, the product was extracted using methylene chloride and  $\text{NH}_4\text{Cl}$  aqueous solution. After drying the methylene chloride solution with  $\text{MgSO}_4$ , the solvent was evaporated by a rotary evaporator. The product was separated by flash column chromatography. Characterization data of (1Z,3Z)-1,4-diphenyl-1,4-bis(propylthio)buta-1,3-diene: Isolated yield: 53%,  $^1\text{H}$  NMR (500 MHz,  $\text{CDCl}_3$ )  $\delta$  = 7.63 (d,  $J$  = 7.4 Hz, 4H), 7.38 (t,  $J$  = 7.5 Hz, 4H), 7.35 (s, 2H), 7.31 (t,  $J$  = 7.3 Hz, 2H), 2.43 (t,  $J$  = 7.2 Hz, 4H), 1.45 (sextet,  $J$  = 7.3 Hz, 4H), 0.87 (t,  $J$  = 7.3 Hz, 6H) ppm,  $^{13}\text{C}$  NMR (125 MHz,  $\text{CDCl}_3$ )  $\delta$  = 140.3, 139.7, 131.2, 128.4, 128.1, 128.0, 34.9, 23.2, 13.2 ppm, HR-MS: Calc.  $[\text{M}]^+$ ,  $\text{C}_{22}\text{H}_{26}\text{S}_2$ , 354.1476, Obs. 354.1473.

For the single addition reaction<sup>4</sup> of 1-propanethiol to 1,4-diphenylbutadiyne, the same synthetic procedures used for the double addition reaction of 1-propanethiol to 1,4-diphenylbutadiyne were applied except using azobis(isobutyronitrile) (AIBN, 0.164 mg, 1.00 mmol) and 1-propanethiol (0.093 mL, 1.0 mmol), instead of azobis(isobutyronitrile) (AIBN, 0.657 mg, 4.00 mmol) and 1-propanethiol (0.37 mL, 4.0 mmol). The other procedures are the same as those for the double 1-propanethiol adduct of 1,4-diphenylbutadiyne. Characterization data of (1,4-diphenylbut-1-en-3-yn-1-yl)(propyl)sulfane: Isolated yield: 27% ( $Z:E=60:40$ ), a  $Z$  isomer,  $^1\text{H}$  NMR (500 MHz,  $\text{CDCl}_3$ )  $\delta$  7.71~7.50 (m, 4H), 7.43~7.30 (m, 6H), 6.04 (s, 1H), 2.61 (t,  $J$  = 7.2 Hz, 2H), 1.51 (sextet,  $J$  = 7.3 Hz, 2H), 0.92 (t,  $J$  = 7.3 Hz, 3H) ppm, an  $E$  isomer  $^1\text{H}$  NMR (500 MHz,  $\text{CDCl}_3$ )  $\delta$  7.71~7.49 (m, 4H), 7.49~7.28 (m, 6H), 5.88 (s, 1H), 2.66 (t,  $J$  = 7.2 Hz, 2H), 1.65 (sextet,  $J$  = 7.3 Hz, 2H), 0.99 (t,  $J$  = 7.4 Hz, 3H) ppm,  $^{13}\text{C}$  NMR (125 MHz,  $\text{CDCl}_3$ )  $\delta$  = 149.9, 139.0, 131.5, 131.2, 129.2, 129.1, 129.0, 128.8, 128.7, 128.5, 128.4, 128.3, 128.2, 128.1, 128.0, 127.9, 127.7, 127.3, 125.6, 123.7, 109.8, 103.9, 97.2, 87.7, 34.8, 34.5, 23.2, 22.1, 13.4, 13.1 ppm, HR-MS: Calc.  $[\text{M}]^+$ ,  $\text{C}_{19}\text{H}_{18}\text{S}$ , 278.1129, Obs. 278.1130.

### ***Computational simulations of strain energies for the PSM of CMPs***

To investigate the reason for the different reactivities of H-CMP-1 and H-CMP-G towards thiol-yne reaction, we carried out the density functional theory (DFT) calculations within periodic boundary conditions. For the

geometrical optimization calculations, the Perdew-Burke-Ernzerhof (PBE)/light-tier-1 level of theory with a  $1\times 1\times 1$  mesh of  $k$ -points was used, and the convergence criteria was set to  $0.01\text{ eV}/\text{\AA}$ . We designed the ideal network structures of H-CMP-1 and H-CMP-G having a planar and hexagonal shape, as shown in Fig. S7. Herein, it should be noted that actual systems would have an amorphous structure. To eliminate interaction between slabs along the  $z$ -axis, the vacuum space of  $30\text{ \AA}$  was added and the lattice parameter  $c$  was fixed. Both atomic positions and lattice parameters only except  $c$  were fully optimized for H-CMP-1 and H-CMP-G. Then, the model systems (Cases 1–4 in Fig. S7) were designed to estimate the strain energies that arise from thiol addition to these ideal network structures according to alkyne carbon sites. In order to reduce the computational costs, the propyl group in 1-propanthiol was substituted by a methyl group. To calculate the strain energies, we assumed two conditions as below. We simplified a thiol-yne reaction as the concerted reaction. Rigorously, the radical mediated thiol-yne reaction might consist of a propagation step and a chain transfer step.<sup>5</sup> However, we noted that our proposed reaction scheme would be enough to describe the reaction energy and strain energy for overall (net) reaction instead of the transition state energy for each of the reaction steps.

As the structural strain energies, we considered the changes of self-consistent field (SCF) energies between the optimized structures with and without the constraint options for the fixed positions of benzene rings denoted in Fig. S7. The network structure connected with the benzene rings and alkyne moieties in H-CMP-1 and H-CMP-G might be closely packed by surrounding polymer network structures and disordered in amorphous manner. Thus, the geometrical changes induced by a thiol addition would become the inevitable strains required to complete the reaction. Especially, the benzene rings, bulkier building blocks than alkyne moieties, could receive more constrains than alkyne moieties. Hence, we thought that the difference of SCF energies between the optimized structure having the fixed benzene ring positions and fully relaxed structure could represent most of the structural strain energies accompanying with the thiol addition.

The initial geometry for Cases 1–4 were designed to keep the planarity of H-CMP-1 or H-CMP-G locating a methyl thiyl group ( $-\text{SCH}_3$ ) and a hydrogen atom ( $-\text{H}$ ) near an alkyne. First, geometrical optimizations with the fixed benzene ring positions were carried out. Then, based on these optimized geometries, fully relaxed structures were obtained without any atomic constraints. Finally, we defined the strain energy ( $\Delta E_{\text{strain}}$ ) as follows:  $\Delta E_{\text{strain}} = E_{\text{fix}} - E_{\text{full}}$ , where  $E_{\text{fix}}$  and  $E_{\text{full}}$  are the SCF energy for optimized structure with the fixed benzene ring positions and the SCF energy for the fully optimized structures, respectively.

For Cases 1–4 calculations, the lattice parameters, that is,  $\alpha$ ,  $\beta$ ,  $\gamma$  and  $c$  were fixed to avoid the interference between a unit cell and itself. From our tests, severe lattice parameter changes were observed without these lattice parameter constraints, resulting in serious convergence problems as well as interaction between slabs. We thought that this kind of deformation of a unit cell might happen to cancel the net dipole moment of a unit cell. Thus, the length parameters  $a$  and  $b$  were fully relaxed to consider the strains for a unit cell changes that result from thiol addition. All DFT calculations were conducted using FHI-aims code.<sup>6</sup>

## Reference

1. W. Stöber, A. Fink and E. Bohn, Controlled Growth of Monodisperse Silica Spheres in the Micron Size Range. *J. Colloid Interface Sci.* 1968, **26**, 62-69.
2. H. E. Ho, A. Pagano, J. A. Rossi-Ashton, J. R. Donald, R. G. Epton, J. C. Churchill, M. J. James, P. O'Brien, R. J. K. Taylor and W. P. Unsworth, Visible-light-induced Intramolecular Charge Transfer in the Radical Spirocyclisation of Indole-tethered Ynones. *Chem. Sci.* 2020, **11**, 1353-1360.
3. M. Koreeda and Y. Wang, Novel Synthesis of 3,6-Disubstituted 1,2-Dithin Molecules Involving a Direct Oxidative Deprotection-Cyclization Sequence from 1,4-Bis(*tert*-butylthio)-1,3-butadiene Precursors. *J. Org. Chem.* 1997, **62**, 446-447.
4. H. B. Abed and S. A. Blum, Transition-Metal-Free Synthesis of Borylated Thiophenes via Formal Thioboration. *Org. Lett.* 2018, **20**, 6673-6627.
5. R. M. Stolz and B. H. Northrop, Experimental and Theoretical Studies of Selective Thiol–Ene and Thiol–Yne Click Reactions Involving N-Substituted Maleimides. *J. Org. Chem.* 2013, **78**, 8105-8116.
6. V. Blum, R. Gehrke, F. Hanke, P. Havu, V. Havu, X. Ren, K. Reuter and M. Scheffler, Ab Initio Molecular Simulations with Numeric Atom-Centered Orbitals. *Comput. Phys. Commun.* 2009, **180**, 2175-2196.

**Fig. S1** SEM images of H-CMP-1, H-CMP-Br, H-CMP-G, H-CMP-1-PT, H-CMP-Br-PT, and H-CMP-G-PT.

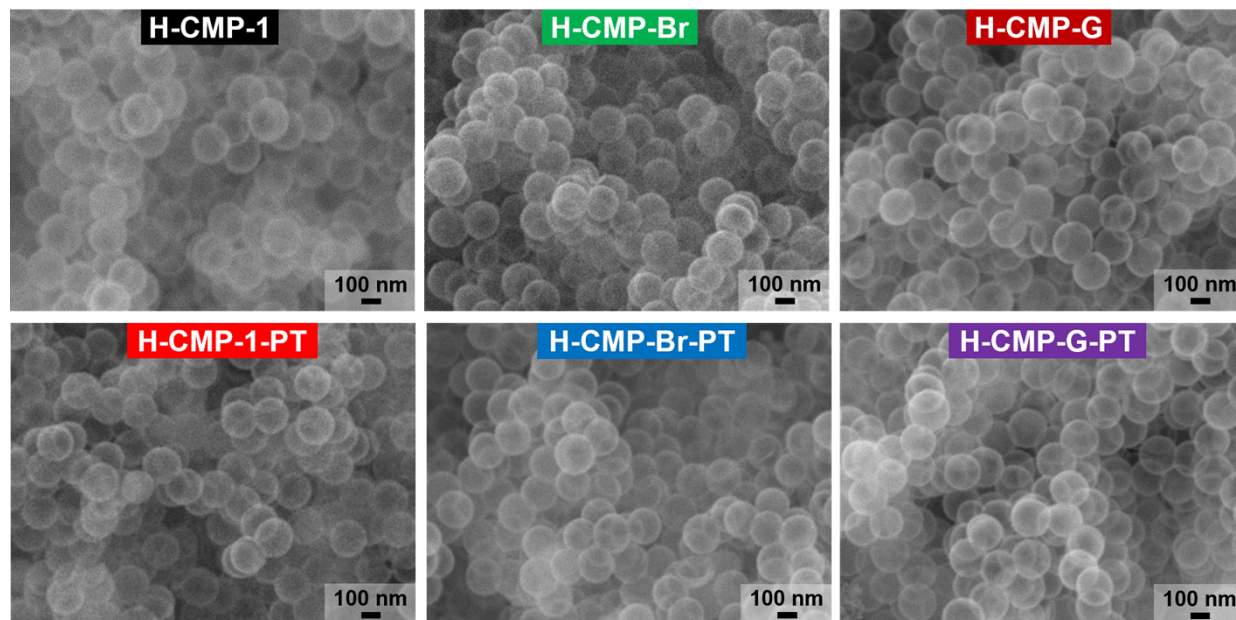

**Fig. S2** Additional TEM images of H-CMP-1, H-CMP-Br, H-CMP-G, H-CMP-1-PT, H-CMP-Br-PT, and H-CMP-G-PT.

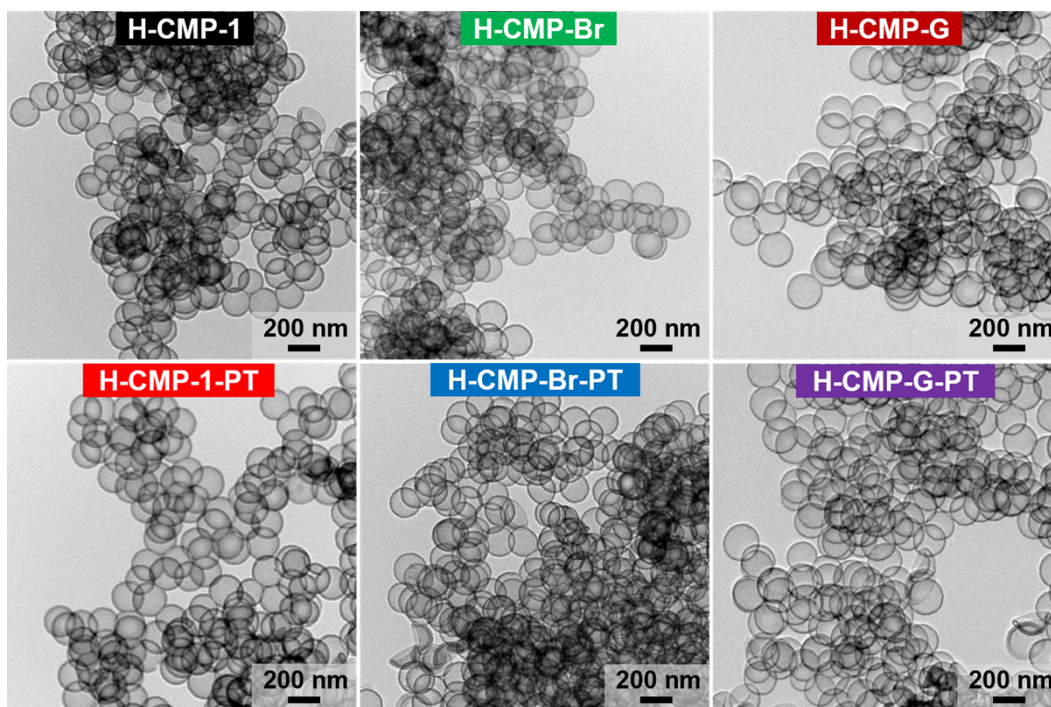

**Fig. S3** N<sub>2</sub> adsorption-desorption isotherm curves obtained at 77K and pore size distribution diagrams of H-CMP-1, H-CMP-Br, H-CMP-G, H-CMP-1-PT, H-CMP-Br-PT, and H-CMP-G-PT.

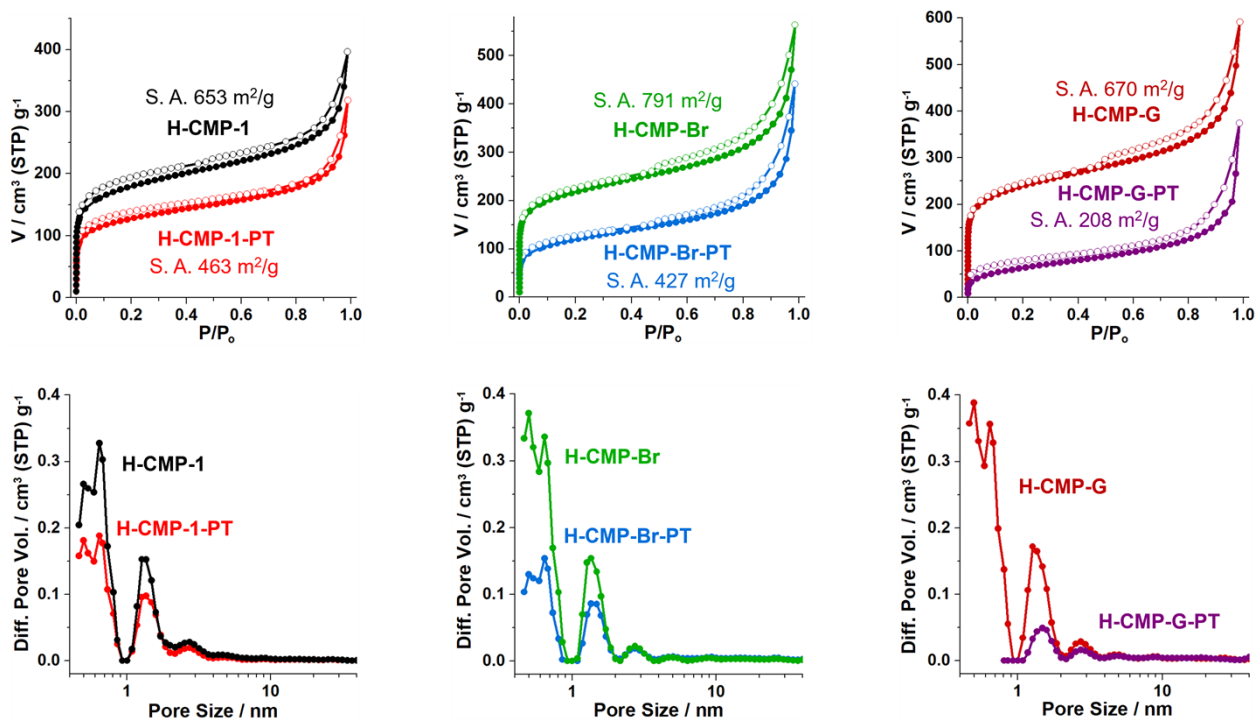



**Fig. S4** IR absorption spectra of H-CMP-1, H-CMP-Br, H-CMP-G, H-CMP-1-PT, H-CMP-Br-PT, and H-CMP-G-PT.

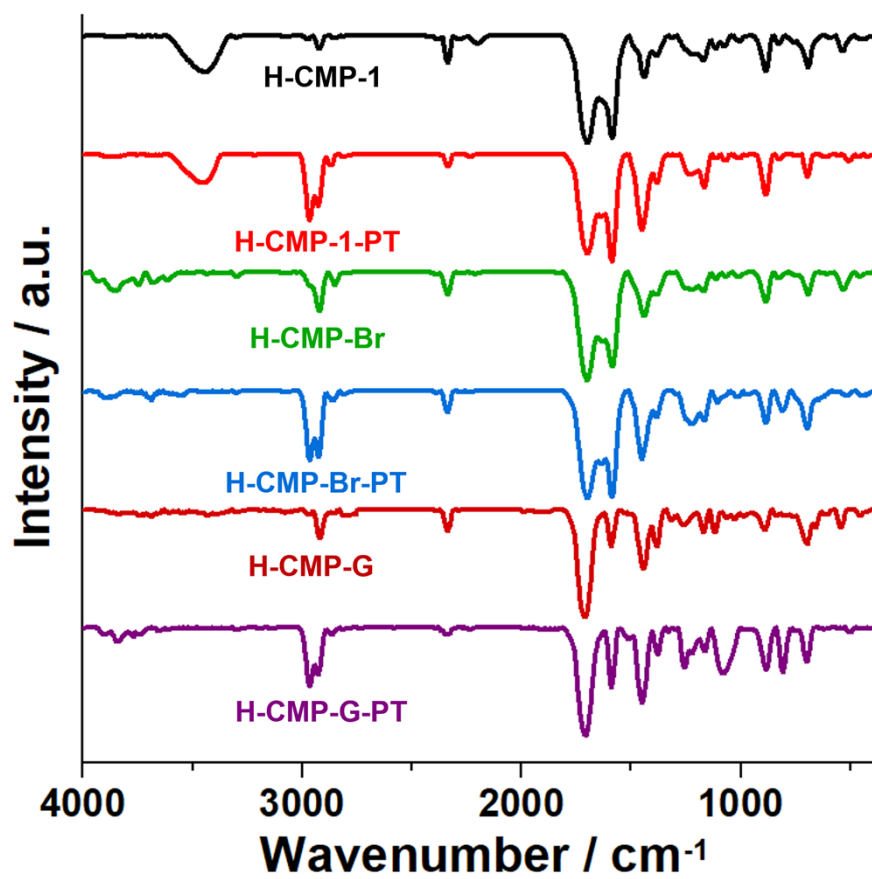

**Fig. S5**  $^1\text{H}$  and  $^{13}\text{C}$  NMR spectra of a double 1-propanethiol adduct (an unknown compound) to 1,4-diphenyl-1,3-butadiyne.

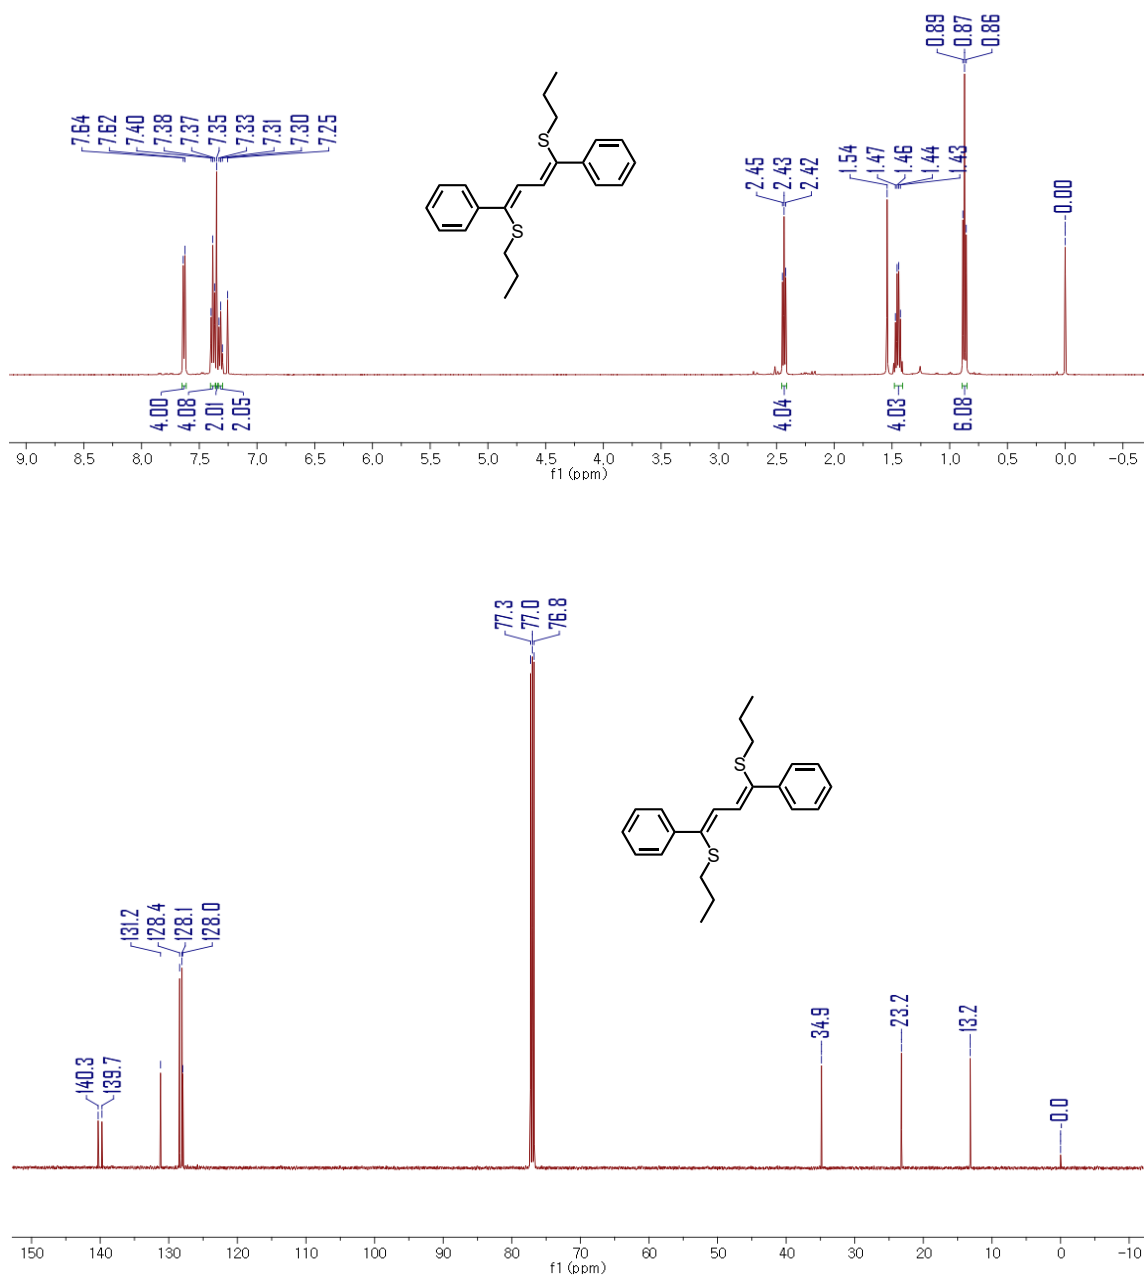

**Fig. S6**  $^{13}\text{C}$  NMR spectra of diphenylacetylene, 1,4-diphenyl-1,3-butadiyne, and their 1-propanethiol adducts.

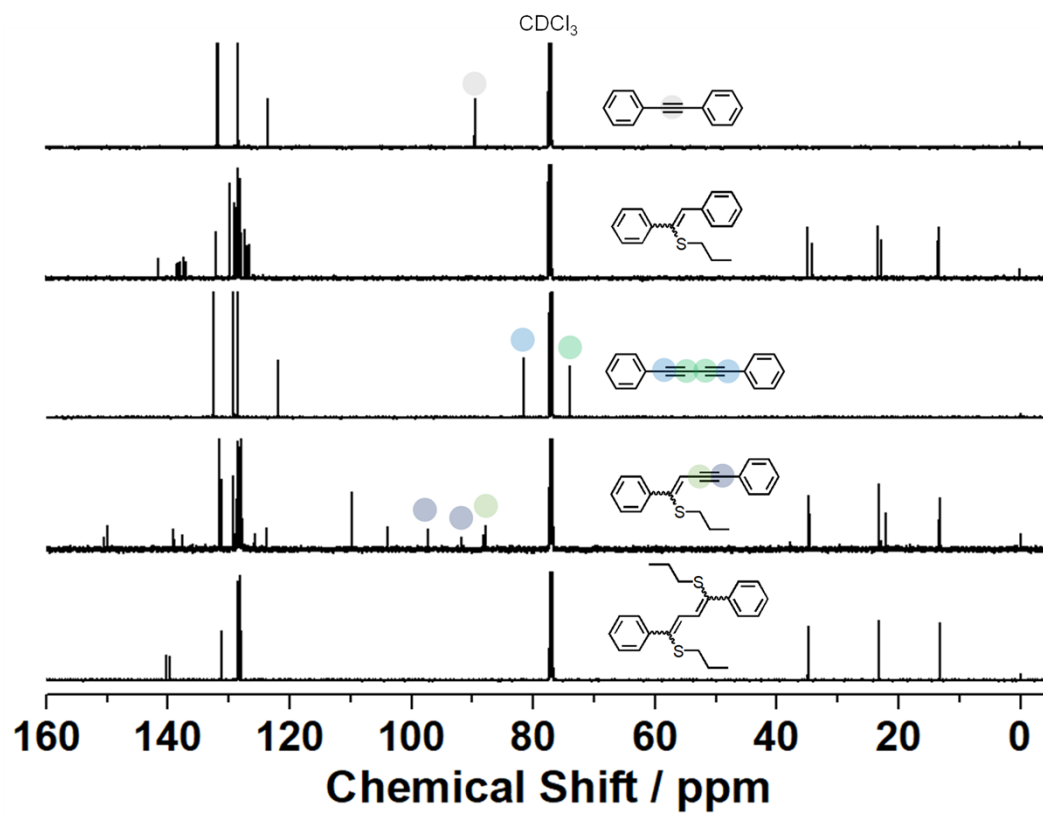

**Fig. S7.** The designed model systems for ideal network structures of H-CMP-1 and H-CMP-G to calculate structural strain energies of the thiol addition reaction, and their optimized structures with/without constraints of benzene positions using DFT method.

| Model   | Schematic figures                                                                   | Optimized structures                                                                                                                                                    |                                                                                                                                                                                                                                                                                                                                                                  | Strain Energy ( $\Delta E_{\text{strain}}$ in Kcal/mol) |
|---------|-------------------------------------------------------------------------------------|-------------------------------------------------------------------------------------------------------------------------------------------------------------------------|------------------------------------------------------------------------------------------------------------------------------------------------------------------------------------------------------------------------------------------------------------------------------------------------------------------------------------------------------------------|---------------------------------------------------------|
|         |                                                                                     | Optimization with the fixed benzene rings                                                                                                                               | Full optimization without the fixed benzene rings                                                                                                                                                                                                                                                                                                                |                                                         |
| H-CMP-1 | 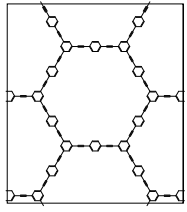   |                                                                                                                                                                         | <div style="display: flex; justify-content: space-around;"> <div style="text-align: center;"> <p>Side view</p>  </div> <div style="text-align: center;"> <p>Top view</p>  </div> </div>     |                                                         |
| Case 1  |   |     |                                                                                                                                                                                           | 11.12                                                   |
| Case 2  |  |   |                                                                                                                                                                                         | 11.60                                                   |
| H-CMP-G |  |                                                                                                                                                                         | <div style="display: flex; justify-content: space-around;"> <div style="text-align: center;"> <p>Side view</p>  </div> <div style="text-align: center;"> <p>Top view</p>  </div> </div> |                                                         |
| Case 3  |  |   |                                                                                                                                                                                         | 6.38                                                    |
| Case 4  |  |   |                                                                                                                                                                                         | 4.33                                                    |

**Fig. S8** The calculated self-consistent field (SCF) energies (in eV) and strain energies (in kcal/mol) in the main chain post-synthetic modification by thiol-yne reactions based on the model systems. The strain energy is defined as  $\Delta E_{\text{strain}} = E_{\text{fix}} - E_{\text{full}}$ , where  $E_{\text{fix}}$  and  $E_{\text{full}}$  are the SCF energy for optimized structure with the fixed benzene ring positions and the SCF energy for fully optimized structures, respectively.

| Model systems                                                                          | HSCH <sub>3</sub> | H-CMP-1          | Case 1           | Case 2           | H-CMP-G         | Case 3           | Case 4           |
|----------------------------------------------------------------------------------------|-------------------|------------------|------------------|------------------|-----------------|------------------|------------------|
| SCF energy for fully optimized structures ( $E_{\text{full}}$ in eV)                   | -11932.46075306   | -175194.61568583 | -187128.40228361 | -187128.41248395 | -99816.55291279 | -111750.34566598 | -111750.32288047 |
| SCF energy for optimized structures with fixed benzene rings ( $E_{\text{fix}}$ in eV) |                   |                  | -187127.91989434 | -187127.90967828 |                 | -111750.06896514 | -111750.13514689 |
| Strain Energy ( $\Delta E_{\text{strain}}$ in kcal/mol)                                |                   |                  | 11.12            | 11.60            |                 | 6.38             | 4.33             |

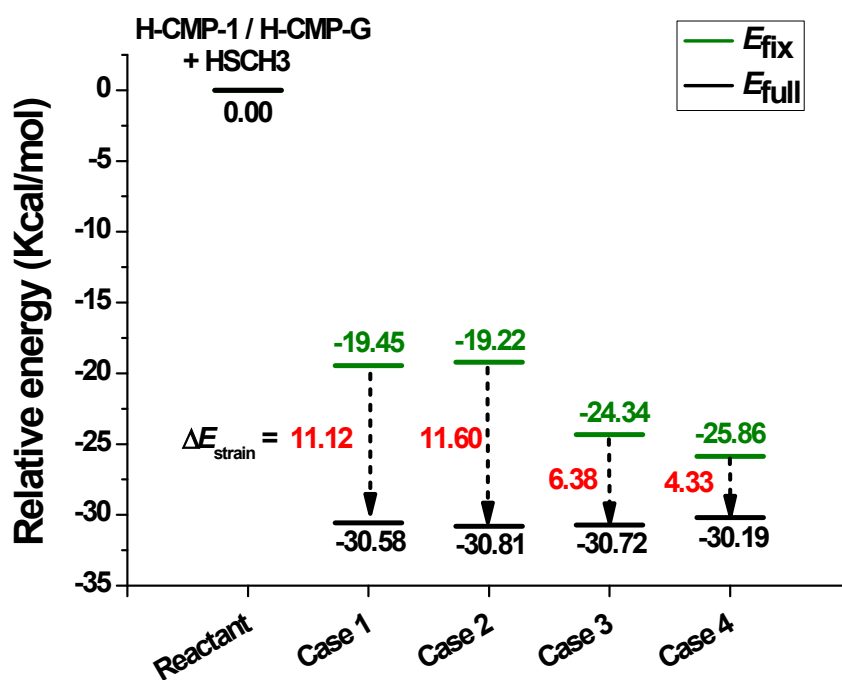

**Fig. S9** The cartesian coordinates (in Å) of optimized geometries for the ideal structures of H-CMP-1 and H-CMP-G and for the structures of Case 1–4.

**H-CMP-1**

C 25.916873932 32.963504791 15.596767426  
 C 26.620887756 31.743764877 15.592917442  
 C 28.029056549 31.732170105 15.588161469  
 C 28.733457565 32.951698303 15.588331223  
 C 28.039436340 34.177017212 15.592508316  
 C 26.631105423 34.177165985 15.596788406  
 C 29.347059250 26.983707428 15.563409805  
 C 30.037216187 25.781316757 15.552721024  
 C 31.451517105 25.761941910 15.545605659  
 C 32.148128510 26.992982864 15.551061630  
 C 31.458023071 28.195280075 15.561786652  
 C 30.043685913 28.214714050 15.567499161  
 C 32.783302307 21.027265549 15.501067162  
 C 33.486347198 19.807575500 15.60066818  
 C 34.894439697 19.817167282 15.473858833  
 C 35.599685669 21.036106110 15.476543427  
 C 34.886840820 22.250560760 15.491212845  
 C 33.478656769 22.251853943 15.503684998  
 C 28.732564926 30.501918793 15.581011772  
 C 29.340898514 29.441446304 15.575033188  
 C 32.156009674 24.536226273 15.531739235  
 C 32.767257690 23.477508545 15.519181252  
 C 29.359710693 15.076471329 15.489694595  
 C 30.052839279 13.843470573 15.483894348  
 C 31.467172623 13.858723640 15.475630760  
 C 32.160717010 15.059182167 15.474286079  
 C 31.467561722 16.292142868 15.481288910  
 C 30.053190231 16.276823044 15.488486290  
 C 32.781700134 18.577537537 15.484096527  
 C 32.173683167 17.516891479 15.482429504  
 C 25.894750595 9.124682426 15.504553795  
 C 26.598815918 7.905005926 15.506801605  
 C 28.007001877 7.893581867 15.503668785  
 C 28.711177826 9.113165855 15.498256683  
 C 28.017024994 10.338395119 15.496189117  
 C 26.608764648 10.338491440 15.499382973  
 C 29.344741821 12.619862556 15.487831116  
 C 28.730241776 11.562963486 15.491664886  
 C 19.013105392 9.136614799 15.513602257  
 C 19.733818054 7.919481754 15.518681526  
 C 21.120010376 7.919317245 15.518278122  
 C 21.841199875 9.136234283 15.512777328  
 C 21.120597839 10.353364944 15.508943558  
 C 19.734159470 10.353530884 15.509341240  
 C 24.477548599 9.130329132 15.507332802  
 C 23.254962921 9.133765221 15.509462357  
 C 12.142971992 9.12651649 15.500650406  
 C 12.845814705 7.901237011 15.506456375  
 C 14.254019737 7.911004066 15.509893417  
 C 14.959549904 9.129817963 15.507225037  
 C 14.246895790 10.344389915 15.501371384  
 C 12.838625908 10.346021652 15.498275757  
 C 17.599334717 9.135334969 15.511146545  
 C 16.376747131 9.133877754 15.509489059  
 C 8.710563660 15.081230164 15.472583771  
 C 9.399398804 13.878083229 15.475141525  
 C 10.813644409 13.857433319 15.484437943  
 C 11.511437416 15.087827682 15.489860535  
 C 10.822639465 16.290916443 15.487462997  
 C 9.408382416 16.311590195 15.479390144  
 C 5.278439999 21.055896759 15.473133087  
 C 5.984653473 19.837503433 15.470188141  
 C 7.392723560 19.828357697 15.483506203  
 C 8.094814301 21.049074173 15.499908447  
 C 7.398486614 22.273132324 15.502565384  
 C 5.990328789 22.270885468 15.488870621  
 C 12.127887726 11.572073936 15.493154526  
 C 11.517306328 12.631248474 15.489228249  
 C 8.705897331 17.538454056 15.480532646  
 C 8.097791672 18.599052429 15.481946945  
 C 8.733592987 27.013963699 15.556888580  
 C 9.428048134 25.781702042 15.551996231  
 C 10.842353821 25.798540115 15.562379837

C 11.534661293 26.999647141 15.575191498  
 C 10.840216637 28.231884003 15.578180313  
 C 9.425853729 28.215009689 15.569773674  
 C 12.164881706 32.965454102 15.598063469  
 C 12.864924431 31.743492126 15.596838951  
 C 14.273164749 31.750173569 15.598165512  
 C 14.981322289 32.967487335 15.600225449  
 C 14.271359444 34.183723450 15.600805283  
 C 12.863112450 34.188369751 15.599405289  
 C 8.109413147 23.499029160 15.520162582  
 C 8.721791267 24.557058334 15.535240173  
 C 11.545436859 29.457189560 15.586573601  
 C 12.156529427 30.516073227 15.591417313  
 C 19.034986496 32.971176147 15.60075722  
 C 19.756315231 31.754415512 15.604897499  
 C 21.142597198 31.754888535 15.604228973  
 C 21.863203049 32.972129420 15.608619461  
 C 21.141918182 34.188903809 15.593640327  
 C 19.755554199 34.188426971 15.594294548  
 C 16.398572922 32.968616486 15.600883484  
 C 17.621183395 32.970439911 15.600012779  
 C 23.277023315 32.971584320 15.598512650  
 C 24.499631882 32.968952179 15.598662376  
 C 37.016765594 21.040575027 15.466642380  
 C 38.239318848 21.041931152 15.459768295  
 C 28.751981735 35.402103424 15.591360092  
 C 29.363386154 36.460838318 15.587179184  
 C 28.711080551 6.662703442 15.506113052  
 C 29.318967819 5.60297123 15.508275032  
 C 12.140755653 6.671897411 15.508344650  
 C 11.531600952 5.611881733 15.510256767  
 C 3.861353874 21.058410645 15.463570595  
 C 2.638801098 21.057111740 15.456920624  
 C 12.153728485 35.415176392 15.596506119  
 C 11.543299675 36.474430084 15.591006279  
 C 39.653053284 21.045461655 15.451811790  
 C 40.377208710 19.830461502 15.444460869  
 C 40.370441437 22.64560699 15.455092430  
 C 0.507695735 19.834373474 15.443743706  
 C 1.225056648 21.053443909 15.450263023  
 C 0.500880539 22.268468857 15.454261780  
 C 30.068208694 37.686435699 15.582076073  
 C 31.482530594 37.705673218 15.580874443  
 C 32.172748566 38.908031464 15.573879242  
 C 31.476331711 40.139190674 15.567735672  
 C 30.061979294 40.119922638 15.569244385  
 C 29.371801376 38.917644501 15.576304436  
 C 9.423273087 37.716087341 15.584125519  
 C 10.837656975 37.699451447 15.585049629  
 C 11.531974792 38.931758881 15.578882217  
 C 10.839524269 40.132759094 15.572048187  
 C 9.425132751 40.149402618 15.571079254  
 C 8.730829239 38.917076111 15.577322960  
 C 30.024997711 1.944751859 15.522371292  
 C 31.439346313 1.929145336 15.520269394  
 C 32.132690430 3.162070990 15.513104439  
 C 31.439537048 4.362605572 15.508804321  
 C 30.025125504 4.378239155 15.511509895  
 C 29.331764221 3.145365477 15.518086433  
 C 9.414116859 1.936364055 15.522104263  
 C 10.828507423 1.952955365 15.525594711  
 C 11.521121025 3.153931141 15.521217346  
 C 10.826915741 4.386299610 15.513224602  
 C 9.412473679 4.369629383 15.508959770  
 C 8.719959259 3.168757677 15.513349533  
 C 8.719330788 41.374309540 15.564490318  
 C 8.108978271 42.433605194 15.558712959  
 C 32.179847717 41.365489960 15.560832977  
 C 32.787117004 42.426589966 15.555173874  
 C 8.707472801 0.711952031 15.528096199  
 C 8.114883423 47.333240509 15.533564568  
 C 32.147262573 0.705429554 15.526107788  
 C 32.777400970 47.327209473 15.531849861

C 5.993721008 43.669281006 15.551336288  
 C 7.401967525 43.661777496 15.551822662  
 C 8.102853775 44.883213043 15.545516014  
 C 7.405339241 46.106510162 15.538908958  
 C 5.997094631 46.102706909 15.538334846  
 C 5.286343575 44.887012482 15.544557571  
 C 33.49224011 43.655822754 15.548732758  
 C 34.900669098 43.664619446 15.548270226  
 C 35.607170105 44.882869720 15.542308807  
 C 34.895477295 46.097991943 15.536845207  
 C 33.487190247 46.100582123 15.537208557  
 C 32.790576935 44.876716614 15.543193817  
 C 3.869174004 44.88954163 15.544177055  
 C 2.646596909 44.890438080 15.543198036  
 C 37.024341583 44.885433197 15.542569160  
 C 38.246913910 44.887943268 15.542640686  
 C 0.512427151 43.673191071 15.548915863  
 C 1.232833743 44.890422821 15.543486595  
 C 0.511571050 46.107246399 15.537734032  
 C 40.381999969 43.672790527 15.548583031  
 C 40.381065369 46.106853485 15.537490845  
 C 39.660690308 44.889595032 15.542939186  
 H 26.072383881 30.802864075 15.592411041  
 H 29.822559357 32.947044373 15.584397316  
 H 26.090574265 35.122661591 15.599575043  
 H 28.256830215 26.991239548 15.568418613  
 H 29.493883133 24.836095810 15.548916817  
 H 33.238353729 26.985361099 15.546016693  
 H 32.001388550 29.140481949 15.565324783  
 H 31.694242477 21.023723602 15.510972977  
 H 35.442035675 18.875810623 15.462681770  
 H 35.428398132 23.275468903 15.49373189  
 H 28.269474030 15.071825981 15.495799065  
 H 32.007816315 12.911969185 15.470821381  
 H 33.250965118 15.063687325 15.468420982  
 H 29.512695312 17.223653793 15.493605614  
 H 26.050405502 6.964070797 15.510933876  
 H 29.800281525 9.108648300 15.495910645  
 H 26.068101883 11.283912659 15.497795105  
 H 19.184371948 6.977814198 15.522335052  
 H 21.669181824 6.977488041 15.521472931  
 H 21.670089722 11.295022964 15.504970551  
 H 19.184909821 11.295329094 15.505814552  
 H 11.053859711 9.118326187 15.498604995  
 H 14.801297188 6.969408512 15.514320374  
 H 14.788586617 11.289219856 15.499258995  
 H 7.620346546 15.089983940 15.466074944  
 H 8.855023384 12.933478355 15.470517159  
 H 12.601648331 15.078945160 15.496655464  
 H 11.366838455 17.235624313 15.492453375  
 H 5.437787056 18.895727158 15.458212852  
 H 9.183864594 21.046453476 15.511046410  
 H 5.448074341 23.215398788 15.491513252  
 H 7.643369198 27.008319855 15.549514771  
 H 11.383968353 24.852325439 15.559270859  
 H 12.624886513 27.005268907 15.582274437  
 H 8.884148598 29.161169052 15.572654724  
 H 11.075765610 32.964641571 15.596493721  
 H 14.818449974 30.807411194 15.596845627  
 H 14.815184593 35.127326965 15.601606369  
 H 19.207313538 30.812484741 15.609307289  
 H 21.692182541 30.813301086 15.607943535  
 H 21.690982819 35.130802155 15.589087486  
 H 19.205892563 35.129985809 15.590374947  
 H 39.830493927 18.887195587 15.440825462  
 H 39.818328857 23.204662323 15.459708214  
 H 1.059754491 18.894227982 15.439679146  
 H 1.047612190 23.211717606 15.458128929  
 H 32.025852203 36.760448456 15.585353851  
 H 33.262996674 38.915546417 15.572990417  
 H 29.518674850 41.065158844 15.564713478  
 H 28.281562805 38.910137177 15.577162743  
 H 8.881896973 36.769756317 15.588722229

H 12.62226715 38.926284790 15.579388618  
H 11.380990982 41.079040527 15.567322731  
H 7.640571594 38.922679901 15.576686859  
H 29.484121323 0.998131096 15.527762413  
H 33.222949982 3.157196760 15.511316299  
H 31.980381012 5.309241295 15.503588676  
H 28.241508484 3.150196314 15.520066261

H 11.369902611 1.006630063 15.532011032  
H 12.611370087 3.159320354 15.524305344  
H 8.871104240 5.315952301 15.502481461  
H 7.629707336 3.163263798 15.510208130  
H 5.447934151 42.726825714 15.556312561  
H 9.191969872 44.881622314 15.545997620  
H 5.453876019 47.046649933 15.533221245

H 35.447273254 42.722637177 15.552700996  
H 35.438030243 47.042316437 15.532307625  
H 31.701456070 44.874446869 15.543572426  
H 1.062141895 42.731670380 15.553473473  
H 1.060595274 47.049160004 15.533372879  
H 39.832794189 42.730987549 15.552978516  
H 39.831554413 47.048488617 15.533208847

### Case 1\_full

C 25.89266890 32.82162126 15.49641848  
C 26.57872385 31.59064219 15.48695052  
C 27.98763787 31.55437183 15.48079952  
C 28.71117626 32.76404172 15.48405371  
C 28.03800744 34.00237059 15.49299203  
C 26.62866681 34.02347437 15.49900118  
C 29.22068521 26.77227771 15.41682721  
C 29.88896525 25.55610949 15.40863547  
C 31.30254152 25.50648434 15.44079575  
C 32.01824859 26.72683563 15.48051449  
C 31.35023419 29.24237367 15.48793479  
C 29.93636425 27.99233812 15.45649654  
C 32.68701305 20.75127288 15.37888242  
C 33.42630925 20.95168109 15.38838242  
C 34.83310668 19.60630712 15.46102691  
C 35.50289280 20.8461735 15.51778993  
C 34.75124931 22.03631347 15.50875824  
C 33.34382010 21.99726628 15.44107946  
C 28.66982879 30.30898205 15.47233860  
C 29.25589831 29.23473967 15.46533403  
C 31.99165681 24.26885465 15.43489166  
C 32.60426761 23.20950120 15.43514733  
C 29.86754425 14.36770918 14.65023108  
C 30.67633264 13.24330330 14.90637685  
C 32.01590235 13.46341111 15.28647839  
C 32.52541110 14.74897632 15.41317702  
C 31.71389956 15.87760001 15.15009044  
C 30.37045719 15.66025969 14.77170475  
C 32.77676840 18.28992644 15.31749807  
C 32.25964744 17.18356102 15.24417951  
C 26.01403724 9.15948876 15.42359990  
C 26.65545765 7.90599890 15.36753598  
C 28.05949278 7.82869852 15.33271766  
C 28.82238970 9.01721051 15.33158843  
C 28.20249255 10.27982231 15.35809494  
C 26.79560084 10.33203709 15.43184124  
C 19.11897748 9.28149884 15.58047505  
C 19.83939348 8.06413407 15.54009166  
C 21.22638843 8.05980257 15.51665436  
C 21.95652975 9.27240883 15.53251369  
C 21.23604716 10.48947795 15.57546626  
C 19.84842877 10.49394298 15.59902829  
C 24.59601243 9.22832401 15.46965547  
C 23.37280563 8.25968270 15.50160300  
C 12.23954865 9.26131104 15.63060822  
C 12.94230321 8.03983433 15.60910854  
C 14.35167069 8.05274320 15.60362405  
C 15.05849163 9.27242348 15.61860154  
C 14.34232366 10.48634260 15.64027659  
C 12.93306606 10.48807404 15.64610705  
C 17.70236020 9.28331512 15.59860470  
C 16.47855128 9.27832859 15.60936366  
C 8.74015259 15.17171072 15.70735979  
C 9.45223481 13.98105064 15.69730864  
C 10.86728479 13.98300245 15.69337998  
C 11.53876562 15.22854507 15.70149365  
C 10.82667590 16.41925675 15.71148806  
C 9.41165801 16.41723492 15.71385349  
C 5.19480537 21.10164697 15.72383551  
C 5.92082861 19.89350581 15.72681928  
C 7.33011854 19.90314351 15.72511043  
C 8.01291897 21.13595045 15.72111041  
C 7.29977371 22.35180731 15.71790298  
C 5.89065769 22.32741472 15.71975952  
C 12.21608438 11.71355716 15.66543094  
C 11.59249130 12.76632919 15.67993470  
C 8.68480226 17.63298271 15.72056340  
C 8.05606011 18.68281387 15.72436811  
C 8.63200988 27.11117376 15.68303935  
C 9.31884544 25.87405813 15.68944563  
C 10.73377362 25.88934647 15.68175143  
C 11.43088131 27.08863954 15.66734592  
C 10.74402869 28.32591847 15.66023318

C 9.32924754 28.31071989 15.66873302  
C 12.12021878 33.05792753 15.61765174  
C 12.80287523 31.82497029 15.61697072  
C 14.21214748 31.81451280 15.60231462  
C 14.93871631 33.02209245 15.58859858  
C 14.24320140 34.24791528 15.58971108  
C 12.83410798 34.27315933 15.60426027  
C 7.99781069 23.58830563 15.71064095  
C 8.60937436 24.64815358 15.70160054  
C 11.45812308 29.54911928 15.64416376  
C 12.07924212 30.60335785 15.6128139311  
C 18.99800972 32.95586456 15.54929058  
C 19.69947955 31.72688847 15.54396191  
C 21.08650348 31.70097234 15.53162233  
C 21.83351579 32.90281623 15.52415086  
C 21.13207252 34.13175938 15.52885834  
C 19.74490284 34.15768575 15.54115771  
C 16.35842321 33.00223187 15.57443737  
C 17.58188841 32.98171819 15.56269512  
C 23.24964910 32.67351054 15.51281203  
C 24.47306759 32.85075050 15.50418755  
C 36.92096040 20.88940174 15.57463726  
C 38.14362089 20.92381167 15.61263304  
C 28.76897326 35.21990218 15.49612232  
C 29.38781198 36.27567637 15.49970431  
C 28.71445103 6.56873975 15.31623667  
C 29.29970574 5.49393696 15.30728909  
C 12.23322617 6.80952845 15.59156513  
C 11.61389038 5.75414993 15.57498734  
C 3.77496454 21.08183133 15.72095167  
C 2.55146926 21.05975490 15.71320989  
C 12.13995994 35.51182540 15.60566870  
C 11.54134922 36.57910303 15.60883103  
C 39.55924301 20.95981508 15.64665274  
C 40.31254970 19.76191593 15.65962124  
C 40.25418234 22.19232551 15.66260259  
C 0.44035602 19.79543733 15.68485377  
C 1.13545576 21.02794576 15.69667846  
C 0.38223621 22.22586479 15.68742735  
C 30.09680021 37.50217505 15.50272367  
C 31.51159851 37.52478043 15.50108201  
C 32.20296335 38.72798006 15.50428918  
C 31.51013426 39.96174871 15.50908388  
C 30.09516927 39.93899954 15.51061561  
C 29.40401262 38.73619440 15.50751469  
C 9.42916705 37.84251984 15.61345207  
C 10.84385883 37.8182523 15.61062151  
C 11.54408814 39.04150805 15.61004177  
C 10.85991927 40.24854308 15.61251195  
C 9.44535401 40.27911852 15.61542747  
C 8.74507159 39.04944255 15.61563185  
C 29.98012725 1.82163050 15.30548916  
C 31.39467728 1.79214160 15.29661422  
C 32.09328925 3.02287090 15.28816055  
C 31.40795727 4.22888201 15.29007849  
C 29.99297887 4.25890957 15.30074322  
C 29.29456147 3.02822139 15.30775627  
C 9.44628204 2.09491120 15.51239438  
C 10.86141109 2.09853623 15.51726818  
C 11.56894441 3.29184262 15.53786313  
C 10.89292638 4.53482233 15.55474639  
C 9.47774234 4.53114997 15.55046507  
C 8.77018154 3.33782332 15.52968070  
C 8.74539587 41.51044050 15.61828997  
C 8.13656377 42.57190250 15.62131702  
C 32.21301954 41.19166468 15.51270803  
C 32.81501457 42.25710968 15.51507794  
C 8.72514283 0.87577081 15.49084643  
C 8.12472195 47.47920457 15.67734177  
C 32.09886483 0.56304381 15.29811334  
C 32.73562514 47.16539275 15.50689160  
C 6.01574273 43.80334528 15.61587282  
C 7.42492279 43.80058256 15.62790893

C 8.11844027 45.02717220 15.64759513  
C 7.41553890 46.24900755 15.65584853  
C 6.00601097 46.23692434 15.64360762  
C 5.29963816 45.01735883 15.62336290  
C 33.50620009 43.49762215 15.51664990  
C 34.91524443 43.52882343 15.52515188  
C 35.60482381 44.75810664 15.52731405  
C 34.87245506 45.96228543 15.52065375  
C 33.46315729 45.94608444 15.51245959  
C 32.78667058 44.70971451 15.51058019  
C 3.87967491 45.00498469 15.61067545  
C 2.65618459 44.98252738 15.59795518  
C 37.02457609 44.78679234 15.53715025  
C 38.24782691 44.82666428 15.54665628  
C 0.55122552 43.70868341 15.57366513  
C 1.24016279 44.94488719 15.58512658  
C 0.48062768 46.13866891 15.54115771  
C 40.42337410 43.66754728 15.56017356  
C 40.35263232 46.09751272 15.56919036  
C 39.66374444 44.86141227 15.55829857  
C 30.14103781 11.86350323 14.78511880  
C 28.93750882 11.54561044 15.34363719  
C 31.80760855 11.60533992 12.54204771  
H 28.43295303 12.36777689 15.86156296  
H 26.01503041 30.65868989 15.48514849  
H 29.80015710 32.74166779 15.47955711  
H 26.10359309 34.97771364 15.50620530  
H 28.13095307 26.79761437 15.39223309  
H 29.32601222 24.62286356 15.37733899  
H 33.10796306 26.70130109 15.50573540  
H 31.91295215 28.87590518 15.51934438  
H 31.59974987 20.71568499 15.32402040  
H 35.40810785 18.68126736 15.46658667  
H 35.26206352 22.99722940 15.55338437  
H 28.83562250 14.22039148 14.32637773  
H 32.65286063 12.60133019 15.49402315  
H 33.56127209 14.90101651 15.71846850  
H 29.73348277 16.51185159 15.55230900  
H 26.06099934 6.99236504 15.36750969  
H 29.90619570 8.93165832 15.34983594  
H 26.29306586 11.29948118 15.47824197  
H 19.28901175 7.12299025 15.52595245  
H 21.76993743 7.11517979 15.48441968  
H 21.78604634 11.43086794 15.58864416  
H 19.30525369 11.43885103 15.63082397  
H 11.15036310 9.25703004 15.63463566  
H 14.89993094 7.11174435 15.58616494  
H 14.88320165 11.43168621 15.65148669  
H 7.64994166 15.15726465 15.70965298  
H 8.92363857 13.02746210 15.69194321  
H 12.62900221 15.24300607 15.69936027  
H 11.35536924 17.37281795 15.71698522  
H 5.38772585 18.94369523 15.72926037  
H 9.10204841 21.14954990 15.71904720  
H 5.33435975 23.26381039 15.71641386  
H 7.54169971 27.11221672 15.68902787  
H 11.27415738 24.94239663 15.68664361  
H 12.52117480 27.08768576 15.66075109  
H 8.78885333 29.25767161 15.66338868  
H 11.03117434 33.07195833 15.62906260  
H 14.74464964 30.86437862 15.60182484  
H 14.79966675 35.18416531 15.57941282  
H 19.13481340 30.79419121 15.55003634  
H 21.61597549 30.74784196 15.52805721  
H 21.69670386 35.06444881 15.52312913  
H 19.21547012 35.11081635 15.54486742  
H 39.78811335 18.80606182 15.64840256  
H 39.68478814 23.12209787 15.65406005  
H 1.00982020 18.86570781 15.69286458  
H 0.90653101 23.18179442 15.69765137  
H 32.05700715 36.58067447 15.49738424  
H 33.29327683 38.73230692 15.50331849  
H 29.55005513 40.88325866 15.51434464

H 28.31369258 38.73174038 15.50872519  
H 8.87858368 36.90143756 15.61396904  
H 12.63436232 39.03065856 15.60786953  
H 11.41052477 41.18962048 15.61212745  
H 7.65481611 39.06038803 15.61775676  
H 29.43022026 0.88012395 15.31137144  
H 33.18359517 3.01314469 15.28103442  
H 31.95730548 5.17069420 15.28422725  
H 28.20428728 3.03767081 15.31552391

H 11.39393236 1.14717004 15.50461173  
H 12.65921646 3.28133017 15.54118791  
H 8.94521737 5.48249233 15.56382623  
H 7.67992453 3.34830022 15.52673064  
H 5.47458862 42.85824177 15.60069258  
H 9.20760851 45.03170295 15.65745779  
H 5.45801607 47.17821649 15.64981502  
H 35.47594021 42.59504781 15.53065502  
H 35.40076392 46.91475758 15.52218951

H 31.69765329 44.69046825 15.50460231  
H 1.12569925 42.78199822 15.57505326  
H 0.99981180 47.09742287 15.59120028  
H 39.90408086 42.70888911 15.55217738  
H 39.77824023 47.02429920 15.56799030  
H 32.44459247 12.44143662 12.85222133  
H 32.40638820 10.88239194 11.97389861  
H 30.98400377 11.96464820 11.91414406  
S 31.16309347 10.66634887 13.96372769

### Case 1\_fix

C 25.91700000 32.96400000 15.59700000  
C 26.62100000 31.74400000 15.59300000  
C 28.02900000 31.73200000 15.58800000  
C 28.73300000 32.95200000 15.58800000  
C 28.03900000 34.17700000 15.59300000  
C 26.63100000 34.17700000 15.59700000  
C 29.34700000 26.98400000 15.56300000  
C 30.03700000 25.78100000 15.55300000  
C 31.45200000 25.76200000 15.54600000  
C 32.14800000 26.99300000 15.55100000  
C 31.45800000 28.19500000 15.56200000  
C 30.04400000 28.21500000 15.56700000  
C 32.78300000 21.02700000 15.50100000  
C 33.48600000 19.80700000 15.48600000  
C 34.89400000 19.81700000 15.47400000  
C 35.60000000 21.03600000 15.47700000  
C 34.88700000 22.25100000 15.49100000  
C 33.47900000 22.25200000 15.50400000  
C 28.73263573 30.50195995 15.58196100  
C 29.34044615 29.44121422 15.57559535  
C 32.15651074 24.53637684 15.53213265  
C 32.76765443 23.47757882 15.51884995  
C 29.36000000 15.07600000 15.49000000  
C 30.05300000 13.84300000 15.48400000  
C 31.46700000 13.85900000 15.47600000  
C 32.16100000 15.05900000 15.47400000  
C 31.46800000 16.29200000 15.48100000  
C 30.05300000 16.27700000 15.48800000  
C 32.78171257 18.57768608 15.47927173  
C 32.17358135 17.51801832 15.47194999  
C 25.89500000 9.12500000 15.50500000  
C 26.59900000 7.90500000 15.50700000  
C 28.00700000 7.89400000 15.50400000  
C 28.71100000 9.11300000 15.49800000  
C 28.01700000 10.33800000 15.49600000  
C 26.60900000 10.33800000 15.49900000  
C 19.01300000 9.13700000 15.51400000  
C 19.73400000 7.91900000 15.51900000  
C 21.12000000 7.91900000 15.51800000  
C 21.84100000 9.13600000 15.51300000  
C 21.12100000 10.35300000 15.50900000  
C 19.73400000 10.35400000 15.50900000  
C 24.47765205 9.12806463 15.51129832  
C 23.25482496 9.13483641 15.51487527  
C 12.14300000 9.12200000 15.50100000  
C 12.84600000 7.90100000 15.50600000  
C 14.25400000 7.91100000 15.51000000  
C 14.96000000 9.13000000 15.50700000  
C 14.24700000 10.34400000 15.50100000  
C 12.83900000 10.34600000 15.49800000  
C 17.59942172 9.13626696 15.51270515  
C 16.37685552 9.13383401 15.51052185  
C 8.71100000 15.08100000 15.47300000  
C 9.39900000 13.87800000 15.47500000  
C 10.81400000 13.85700000 15.48400000  
C 11.51100000 15.08800000 15.49000000  
C 10.82300000 16.29100000 15.48700000  
C 9.40800000 16.31200000 15.47900000  
C 5.27800000 21.05600000 15.47300000  
C 5.98500000 19.83800000 15.47000000  
C 7.39300000 19.82800000 15.48400000  
C 8.09500000 21.04900000 15.50000000  
C 7.39800000 22.27300000 15.50300000  
C 5.99000000 22.27100000 15.48900000  
C 12.12821392 11.57192478 15.49297829  
C 11.51761083 12.63106061 15.48847531  
C 8.70540786 17.53826941 15.47914961  
C 8.09782591 18.59905959 15.48120186  
C 8.73400000 27.01400000 15.55700000  
C 9.42800000 25.78200000 15.55200000  
C 10.84200000 25.79900000 15.56200000  
C 11.53500000 27.00000000 15.57500000  
C 10.84000000 28.23200000 15.57800000

C 9.42600000 28.21500000 15.57000000  
C 12.16500000 32.96500000 15.59800000  
C 12.86500000 31.74300000 15.59700000  
C 14.27300000 31.75000000 15.59800000  
C 14.98100000 32.96700000 15.60000000  
C 14.27100000 34.18400000 15.60100000  
C 12.86300000 34.18800000 15.59900000  
C 8.10913479 23.49903874 15.52056278  
C 8.72141265 24.55721656 15.53662108  
C 11.54604922 29.45669805 15.58762546  
C 12.15722160 30.51545564 15.59325079  
C 19.03500000 32.97100000 15.60000000  
C 19.75600000 31.75400000 15.60500000  
C 21.14300000 31.75500000 15.60400000  
C 21.86300000 32.97200000 15.59900000  
C 21.14200000 34.18900000 15.59400000  
C 19.75600000 34.18800000 15.59400000  
C 16.39836357 32.96826010 15.60040323  
C 17.62102111 32.97085029 15.60010480  
C 23.27702603 32.97154193 15.59909988  
C 24.49965517 32.96910107 15.59908291  
C 37.01683418 21.03954524 15.46550477  
C 38.23935623 21.04137568 15.45778673  
C 28.75124182 35.40220369 15.59216257  
C 29.36333395 36.46053711 15.58825736  
C 28.70973285 6.66318303 15.50942341  
C 29.31880124 5.60280094 15.50999393  
C 12.14072516 6.67179395 15.50699269  
C 11.53247642 5.61123585 15.50847331  
C 3.86112748 21.05793410 15.46267092  
C 2.63863962 21.05679276 15.45520573  
C 12.15425037 35.41509574 15.59654054  
C 11.54371280 36.47425404 15.59150611  
C 39.65300000 21.04500000 15.45200000  
C 40.37700000 19.83000000 15.44400000  
C 40.37000000 22.26500000 15.45500000  
C 0.50800000 19.83400000 15.44400000  
C 1.22500000 21.05300000 15.45000000  
C 0.50100000 22.26800000 15.45400000  
C 30.06800000 37.68600000 15.58200000  
C 31.48300000 37.70600000 15.58100000  
C 32.17300000 38.90800000 15.57400000  
C 31.47600000 40.13900000 15.56800000  
C 30.06200000 40.12000000 15.56900000  
C 29.37200000 38.91800000 15.57600000  
C 9.42300000 37.71600000 15.58400000  
C 10.83800000 37.69900000 15.58500000  
C 11.53200000 38.93200000 15.57900000  
C 10.84000000 40.13300000 15.57200000  
C 9.42500000 40.14900000 15.57100000  
C 8.73100000 38.91700000 15.57700000  
C 30.02500000 1.94500000 15.52200000  
C 31.43900000 1.92900000 15.52000000  
C 32.13300000 3.16200000 15.51300000  
C 31.44000000 4.36300000 15.50900000  
C 30.02500000 4.37800000 15.51200000  
C 29.33200000 3.14500000 15.51800000  
C 9.41400000 1.93600000 15.52200000  
C 10.82900000 1.95300000 15.52600000  
C 11.52100000 3.15400000 15.52100000  
C 10.82700000 4.38600000 15.51300000  
C 9.41200000 4.37000000 15.50900000  
C 8.72000000 3.16900000 15.51300000  
C 8.71893950 41.37397794 15.56465007  
C 8.10908837 42.43361637 15.55932505  
C 32.17954383 41.36550748 15.56215100  
C 32.78653213 42.42682975 15.55692045  
C 8.70732671 0.71089924 15.46731015  
C 8.11538200 47.33407668 15.59117165  
C 32.14620580 0.70426212 15.46510669  
C 32.77600301 47.32748627 15.58910816  
C 5.99400000 43.66900000 15.55100000  
C 7.40200000 43.66200000 15.55200000

C 8.10300000 44.88300000 15.54600000  
C 7.40500000 46.10700000 15.53900000  
C 5.99700000 46.10300000 15.53800000  
C 5.28600000 44.88700000 15.54500000  
C 33.49200000 43.65600000 15.54900000  
C 34.90100000 43.66500000 15.54800000  
C 35.60700000 44.88300000 15.54200000  
C 34.89500000 46.09800000 15.53700000  
C 33.48700000 46.10100000 15.53700000  
C 32.79100000 44.87700000 15.54300000  
C 3.86912431 44.88867085 15.54512080  
C 2.64658886 44.88968673 15.54373751  
C 37.02436508 44.88631627 15.54307751  
C 38.24699452 44.88869651 15.54352544  
C 0.51200000 43.67300000 15.54900000  
C 1.23300000 44.89000000 15.54300000  
C 0.51200000 46.10700000 15.53800000  
C 40.38200000 43.67300000 15.54900000  
C 40.38100000 46.10700000 15.53700000  
C 39.66100000 44.89000000 15.54300000  
C 29.37575694 12.53763602 15.07245142  
C 28.70965424 11.64902160 15.85309950  
C 29.71937612 13.62477665 12.45773375  
H 28.65049286 11.88555860 16.92196427  
H 26.07189320 30.80343988 15.59324636  
H 29.82211959 32.97459262 15.48066677  
H 26.09056609 35.12257285 15.60002810  
H 28.25677192 26.99188407 15.56755843  
H 29.49371228 24.83577743 15.54963899  
H 33.23823989 26.98561025 15.54600474  
H 32.00149412 29.14014649 15.56568398  
H 31.69392893 21.02393100 15.51036626  
H 35.44138029 18.87550738 15.46214070  
H 35.42863384 23.19585997 15.49277057  
H 28.26905916 15.07394002 15.45334017  
H 32.00760469 12.91325761 15.41878939  
H 33.25163180 15.06588363 15.46416377  
H 29.51358570 17.22472494 15.48428920  
H 26.05078933 6.96394244 15.52142284  
H 29.80049557 9.10487538 15.53351062  
H 26.06565496 11.28225019 15.52064222  
H 19.18406704 6.97759350 15.52292191  
H 21.66971903 6.97748572 15.52171510  
H 21.67102684 11.29434740 15.50560882  
H 19.18488459 11.29588674 15.50525464  
H 11.05389205 9.11882415 15.49857286  
H 14.80139448 6.9694916 15.51444275  
H 14.78872631 11.28884672 15.49871402  
H 7.62073667 15.08979383 15.46687908  
H 8.85459941 12.93341103 15.47049706  
H 12.60125045 15.07913589 15.49707890  
H 11.36740386 17.23559394 15.49178866  
H 5.43824139 18.89612106 15.45772012  
H 9.18405394 21.04682268 15.51086313  
H 5.44790885 23.21560959 15.49165772  
H 7.64375479 27.00845912 15.55007508  
H 11.38355530 24.85272542 15.55895447  
H 12.62518960 27.00558028 15.58199827  
H 8.88427990 29.16114633 15.57309387  
H 11.07587454 32.96406456 15.59647299  
H 14.81839662 30.80728117 15.59682021  
H 14.81494386 35.12750787 15.60210127  
H 19.20714131 30.81200952 15.60928563  
H 21.69279927 30.81353187 15.60782438  
H 21.69100778 35.13090498 15.58976062  
H 19.20620310 35.12949924 15.58985082  
H 39.83006744 18.88686744 15.44049321  
H 39.81816018 23.20519401 15.45984673  
H 1.05985100 18.89375753 15.43985380  
H 1.04829708 23.21095196 15.45759616  
H 32.02630717 36.76073217 15.58557056  
H 33.26322215 38.91589550 15.57334153  
H 29.51888121 41.06532555 15.56445964



H 28.28172956 38.91055135 15.57671502  
H 8.88148578 36.76974104 15.58859655  
H 12.62228070 38.92631193 15.57971059  
H 11.38118630 41.07940715 15.56728024  
H 7.64073767 38.92270528 15.57618681  
H 29.48418559 0.99827592 15.51985540  
H 33.22324363 3.15661068 15.50378477  
H 31.98034064 5.30987035 15.50163835  
H 28.24173791 3.15006388 15.51792203

H 11.37055945 1.00675576 15.52576680  
H 12.61126100 3.15968363 15.52196254  
H 8.87085334 5.31640516 15.50057627  
H 7.62977033 3.16323668 15.50272142  
H 5.44834404 42.72647874 15.55726588  
H 9.19206752 44.88168790 15.55419911  
H 5.45355064 47.04683595 15.54001378  
H 35.44751724 42.72295574 15.55400083  
H 35.43752387 47.04237531 15.54009039

H 31.70187078 44.87488065 15.55077039  
H 1.06127627 42.73122174 15.55338275  
H 1.06148305 47.04866566 15.53379947  
H 39.83226539 42.73148672 15.55398020  
H 39.83177865 47.04877026 15.53268100  
H 28.76308482 14.15831975 12.51115552  
H 30.53780394 14.26802459 12.80214723  
H 29.90688110 13.33195940 11.41659296  
S 29.65841800 12.05618955 13.37321644

## Case

C 25.928936005 33.023967743 15.182226181  
C 26.658201218 31.818729401 15.216115952  
C 28.067468643 31.832946777 15.248185158  
C 28.747600555 33.067619324 15.245555878  
C 28.030405045 34.280605316 15.212388039  
C 26.621753693 34.251026154 15.180698395  
C 29.384201050 27.089687347 15.365354538  
C 30.059988022 25.878614426 15.399793625  
C 31.474382401 25.838392258 15.419534683  
C 32.182617188 27.063323975 15.403788567  
C 31.506668091 28.274703979 15.369550705  
C 30.092393875 28.314838409 15.349148750  
C 32.713153839 21.075891495 15.533370018  
C 33.385314941 19.837354660 15.560915947  
C 34.794624329 19.815063477 15.567247391  
C 35.531700134 21.016222000 15.545591354  
C 34.846275330 22.247573853 15.517971992  
C 33.437362671 22.284994125 15.511456490  
C 28.789815903 30.610685349 15.283308983  
C 29.398473740 29.549392700 15.513713074  
C 32.162460327 24.600593567 15.453409195  
C 32.753414154 23.529304504 15.481389999  
C 29.156007767 15.179048538 15.631100655  
C 29.823324203 13.931225777 15.623014450  
C 31.238309860 13.925036430 15.607484818  
C 31.954010010 15.113621712 15.599248886  
C 31.286676407 16.361469269 15.605809212  
C 29.871719360 16.367670059 15.622323990  
C 32.649909973 18.622533798 15.579750061  
C 32.017776489 17.574756622 15.593318939  
C 25.591228485 9.261672020 15.664971352  
C 26.281471252 8.033496857 15.616043091  
C 27.690013885 8.003042221 15.574278831  
C 28.408119202 9.215926170 15.580158234  
C 27.731122971 10.451241493 15.627346992  
C 26.322444916 10.466501236 15.670413017  
C 29.092926025 12.717366219 15.628241539  
C 28.461904526 11.668841362 15.629584312  
C 18.697175980 9.292686462 15.904982567  
C 19.421808243 8.087822914 15.739778519  
C 20.807800293 8.092698097 15.688741684  
C 21.532814026 9.303076744 15.798568726  
C 20.808845520 10.508097649 15.960310936  
C 19.421739578 10.503012657 16.013116837  
C 24.171806335 9.284128189 15.709380150  
C 22.948759079 9.301278114 15.749796867  
C 11.853567123 8.836556435 16.245679855  
C 12.646517754 7.697786808 15.993195534  
C 14.045436859 7.838681221 15.911983490  
C 14.646075249 9.101616859 16.079513550  
C 13.830582619 10.229984283 16.328098297  
C 12.435823441 10.103270531 16.407293320  
C 17.281702042 9.272168159 15.962943077  
C 16.059904099 9.218416214 16.016283035  
C 5.484424114 20.894083023 15.453269958  
C 6.209427834 19.687078476 15.515407562  
C 7.618565083 19.691911697 15.471566200  
C 8.301780701 20.920042038 15.367906570  
C 7.589423231 22.135131836 15.314332008  
C 6.181120396 22.115066528 15.354783058  
C 8.833471298 26.900531769 15.074973106  
C 9.552841187 25.682605743 15.114708900  
C 10.966802597 25.734952927 15.105655670  
C 11.631834984 26.951738358 15.064056396  
C 10.912494659 28.169740677 15.029462814  
C 9.498596191 28.117307663 15.033275604  
C 12.157557487 32.939079285 14.948795319  
C 12.871974945 31.724490103 14.967530251  
C 14.280911446 31.751007080 14.979731560  
C 14.975949287 32.976287111 14.975071907  
C 14.249100685 34.184238434 14.956766129  
C 12.839702606 34.172370941 14.944249153

C 8.282156944 23.371612549 15.229192734  
C 8.872586250 24.441780090 15.170390129  
C 11.592436790 29.411661148 14.998511314  
C 12.181468964 30.484050751 14.979665756  
C 19.035108566 32.997718811 15.036186218  
C 19.759332657 31.782323837 15.065652847  
C 21.146408081 31.782640457 15.093471527  
C 21.870357513 32.998371124 15.093036652  
C 21.146139145 34.213737488 15.062615395  
C 19.759090424 34.213424683 15.034755707  
C 16.395584106 32.991882324 14.992099762  
C 17.619031906 32.996128082 15.011180878  
C 23.286346436 33.000415802 15.122882843  
C 24.509660721 33.006042007 15.150228500  
C 36.951393127 20.986753464 15.549162865  
C 38.174964905 20.963384628 15.549625397  
C 28.712957382 35.525745392 15.211250305  
C 29.281982422 36.609107971 15.210971832  
C 28.381416321 6.763254166 15.528291702  
C 28.983306885 5.698322636 15.490041733  
C 12.028547287 6.429586887 15.833628654  
C 11.461996078 5.351331234 15.715290070  
C 4.064721107 20.885049820 15.486124992  
C 2.841112852 20.889421463 15.506372452  
C 12.113449097 35.924745128 14.932468414  
C 11.488113403 36.444286346 15.928858757  
C 39.591430664 20.942481995 15.544604301  
C 40.300281525 19.178708038 15.593300819  
C 40.331741333 22.147125244 15.487816811  
C 0.684502423 19.700145721 15.583311081  
C 1.424761057 20.946001413 15.523569107  
C 0.715670288 22.128503799 15.477159500  
C 29.933633804 37.866744995 15.211529732  
C 31.345884323 37.953285217 15.217559814  
C 31.981431961 39.186477661 15.218333244  
C 31.233295441 40.387748718 15.213897705  
C 29.821083069 40.301311493 15.207861900  
C 29.185506821 39.068008423 15.206353188  
C 9.353652000 37.672451019 14.916827202  
C 10.768514633 37.664171126 14.931872368  
C 11.449062347 38.904673120 14.954865456  
C 10.745710373 40.100231171 14.966431618  
C 9.330631256 40.108573914 14.955195427  
C 8.650113106 38.868350983 14.928178787  
C 29.679792404 2.031413078 15.402935982  
C 31.094221115 2.006803036 15.367623329  
C 31.788558960 3.239897013 15.372437477  
C 31.099431992 4.443459034 15.411701202  
C 29.684940338 4.468122005 15.448801862  
C 28.990581512 3.235146284 15.442181587  
C 9.389109612 1.654478550 15.376762390  
C 10.802850723 1.694110274 15.338812828  
C 11.482771873 2.899417639 15.443340302  
C 10.778251648 4.117113113 15.592268944  
C 9.363780022 4.077708721 15.624714851  
C 8.684413910 2.873490933 15.518495560  
C 8.616321564 41.331401825 14.976646423  
C 8.007319450 42.392473113 15.002891541  
C 31.886932373 41.964336700 15.215958595  
C 32.460464478 42.725299835 15.221355438  
C 8.689329147 4.426736236 15.283686638  
C 8.088819504 47.293716431 15.215703011  
C 31.799404144 0.778561294 15.329543114  
C 32.430118561 47.639781952 15.298374176  
C 5.905772209 43.664375305 15.038257599  
C 7.314867496 43.631416321 15.043724060  
C 8.035737991 44.841510773 15.09720418  
C 7.360294342 46.076931000 15.149533272  
C 5.951121807 46.095375061 15.143190384  
C 5.217397213 44.893341064 15.088096619  
C 33.154232025 43.964260101 15.226110458  
C 34.563156128 43.979137421 15.200786591

## 2\_full

C 35.269779205 45.198360443 15.206506729  
C 34.553863525 46.411842346 15.238076210  
C 33.144229889 46.412433624 15.264247894  
C 32.450607300 45.184993744 15.257715225  
C 3.797815800 44.926113129 15.088679314  
C 2.574851990 44.968822479 15.094798088  
C 36.689544678 45.193508148 15.182104111  
C 37.912837982 45.168560028 15.162201881  
C 0.391108215 43.831626892 15.081281662  
C 1.159349799 45.019630432 15.107016563  
C 0.479753584 46.26020130 15.147910200  
C 40.008064270 43.882183075 15.098072052  
C 40.096473694 46.310779572 15.164535522  
C 39.328384399 45.122779846 15.141246796  
C 8.338802338 18.469020844 15.534625053  
C 8.948191643 17.409288406 15.592203140  
C 9.623771667 16.165386200 15.668923378  
C 10.928528786 15.999609947 15.147267342  
C 8.993034363 15.043916702 16.252483368  
C 11.561269760 14.766514778 15.213178635  
C 9.639285088 13.816394806 16.326728821  
C 10.949046135 13.644168854 15.822456360  
C 11.687047005 12.387842178 15.848869324  
C 11.566055298 11.288164139 16.649492264  
C 11.206837654 10.187376022 19.209999084  
H 26.128402710 30.867116928 15.218011856  
H 29.836378098 33.084358215 15.270076752  
H 26.063459396 35.185905457 15.154797554  
H 28.294103622 27.107536167 15.350085258  
H 29.502986908 24.941375732 15.411647797  
H 33.272682190 27.045608521 15.419011116  
H 32.063899994 29.211784363 15.357824326  
H 31.624198914 21.098936081 15.527851105  
H 35.319072723 18.860675812 15.588020325  
H 35.410758972 23.178507446 15.500799179  
H 28.065889359 15.197155952 15.643054008  
H 31.764154434 12.969918251 15.601793289  
H 33.044116974 15.095588684 15.586799622  
H 29.345886230 17.322797775 15.627508163  
H 25.721164703 7.099471092 15.611835480  
H 29.496696472 9.198682785 15.547209740  
H 25.794004440 11.418186188 15.707557678  
H 18.874755859 7.148527622 15.654356956  
H 21.353895187 7.185419682 15.563104630  
H 21.355585098 11.447612762 16.045478821  
H 18.876304626 11.438551903 16.139963150  
H 10.769537926 8.730398566 16.307329178  
H 14.668542862 6.964886189 15.725551605  
H 14.297903061 11.203519821 16.479433060  
H 5.676176071 18.740495682 15.593122482  
H 9.390480042 20.930665970 15.336420059  
H 5.626387596 23.051307678 15.310813904  
H 7.743544102 26.872596741 15.080074310  
H 11.531875610 24.802927017 15.134492874  
H 12.721786499 26.979793549 15.059873581  
H 8.933362007 29.049228668 15.005376816  
H 11.068463326 32.924659729 14.940142632  
H 14.837866783 30.815084457 14.994843483  
H 14.780973434 35.134735107 14.954509735  
H 19.212127686 30.839277267 15.066919327  
H 21.693605423 30.839838028 15.116449356  
H 21.693359375 35.156761169 15.061576843  
H 19.211933136 35.156341553 15.011964798  
H 39.741157532 18.783710480 15.637718201  
H 39.796989441 23.096597672 15.450682640  
H 1.219125986 18.750591278 15.619604111  
H 1.274951935 23.063348770 15.431821823  
H 31.933479309 37.034835815 15.221239090  
H 33.073092609 39.240566254 15.226257204  
H 29.233388901 41.219688416 15.203978539  
H 28.096546173 39.013946533 15.201540947  
H 8.818134308 36.722911835 14.898343086

H 12.539312363 38.910884857 14.965323448  
H 11.281102180 41.049827576 14.986152649  
H 7.559848309 38.861846924 14.918686867  
H 29.132978439 1.088125229 15.399128914  
H 32.878547668 3.234446049 15.345774651  
H 31.646278381 5.386725903 15.415737152  
H 27.900617599 3.240435123 15.469379425  
H 11.356637001 0.761512995 15.227751732  
H 12.572578430 2.917131424 15.414840698  
H 8.810393333 5.010480881 15.736390114

H 7.594615459 2.855255842 15.547080994  
H 5.344098568 42.732051849 14.997708321  
H 9.124710083 44.820899963 15.103990555  
H 5.423944950 47.047649384 15.183714867  
H 35.111625671 43.038459778 15.176659584  
H 35.093776703 47.357803345 15.243350983  
H 31.361589432 45.180538177 15.277899742  
H 0.903252900 42.869632721 15.048978806  
H 1.060911059 47.182510376 15.167593002  
H 39.426753998 42.959980011 15.079176903

H 39.584423065 47.272811890 15.197439194  
H 11.427665710 16.849929810 14.681509972  
H 7.978460312 15.149207115 16.638311386  
H 12.564338684 14.658700943 14.794247627  
H 9.101743698 12.971661568 16.752819061  
H 12.467078209 12.309882164 15.083952904  
H 11.447076797 9.169420242 18.882881165  
H 12.114667892 10.710703850 19.531763077  
H 10.499764442 10.142484665 20.048004150  
S 10.341141701 11.138848305 17.921234131

Case

C 25.91700000 32.96400000 15.59700000  
C 26.62100000 31.74400000 15.59300000  
C 28.02900000 31.73200000 15.58800000  
C 28.73300000 32.95200000 15.58800000  
C 28.03900000 34.17700000 15.59300000  
C 26.63100000 34.17700000 15.59700000  
C 29.34700000 26.98400000 15.56300000  
C 30.03700000 25.78100000 15.55300000  
C 31.45200000 25.76200000 15.54600000  
C 32.14800000 26.99300000 15.55100000  
C 31.45800000 28.19500000 15.56200000  
C 30.04400000 28.21500000 15.56700000  
C 32.78300000 21.02700000 15.50100000  
C 33.48600000 19.80700000 15.48600000  
C 34.89400000 19.81700000 15.47400000  
C 35.60000000 21.03600000 15.47700000  
C 34.88700000 22.25100000 15.49100000  
C 33.47900000 22.25200000 15.50400000  
C 28.73283988 30.50213499 15.58202356  
C 29.34070197 29.44140316 15.57570309  
C 32.15651291 24.53661632 15.53246568  
C 32.76774507 23.7767043 15.51918650  
C 29.36000000 15.07600000 15.49000000  
C 30.05300000 13.84300000 15.48400000  
C 31.46700000 13.85900000 15.47600000  
C 32.16100000 15.05900000 15.47400000  
C 31.46800000 16.29200000 15.48100000  
C 30.05300000 16.27700000 15.48800000  
C 32.78165299 18.57785463 15.48617734  
C 32.17458466 17.51759454 15.48785509  
C 25.89500000 9.12500000 15.50500000  
C 26.59900000 7.90500000 15.50700000  
C 28.00700000 7.89400000 15.50400000  
C 28.71100000 9.11300000 15.49800000  
C 28.01700000 10.33800000 15.49600000  
C 26.60900000 10.33800000 15.49900000  
C 19.01300000 9.13700000 15.51400000  
C 19.73400000 7.91900000 15.51900000  
C 21.12000000 7.91900000 15.51800000  
C 21.84100000 9.13600000 15.51300000  
C 21.12100000 10.35300000 15.50900000  
C 19.73400000 10.35400000 15.50900000  
C 24.47778329 9.12947894 15.50256212  
C 23.25491362 9.13469613 15.50766084  
C 12.14300000 9.12200000 15.50100000  
C 12.84600000 7.90100000 15.50600000  
C 14.25400000 7.91100000 15.51000000  
C 14.96000000 9.13000000 15.50700000  
C 14.24700000 10.34400000 15.50100000  
C 12.83900000 10.34600000 15.49800000  
C 17.59945079 9.13625064 15.51272849  
C 16.37691532 9.13387711 15.51051592  
C 8.71100000 15.08100000 15.47300000  
C 9.39900000 13.87800000 15.47500000  
C 10.81400000 13.85700000 15.48400000  
C 11.51100000 15.08800000 15.49000000  
C 10.82300000 16.29100000 15.48700000  
C 9.40800000 16.31200000 15.47900000  
C 5.27800000 21.05600000 15.47300000  
C 5.98500000 19.83800000 15.47000000  
C 7.39300000 19.82800000 15.48400000  
C 8.09500000 21.04900000 15.50000000  
C 7.39800000 22.27300000 15.50300000  
C 5.99000000 22.27100000 15.48900000  
C 12.12838068 11.57196992 15.49270522  
C 11.51783430 12.63114015 15.48819832  
C 8.70541869 17.53827807 15.47913807  
C 8.09779206 18.59903360 15.48112447  
C 8.73400000 27.01400000 15.55700000  
C 9.42800000 25.78200000 15.55200000  
C 10.84200000 25.79900000 15.56200000

C 11.53500000 27.00000000 15.57500000  
C 10.84000000 28.23200000 15.57800000  
C 9.42600000 28.21500000 15.57000000  
C 12.16500000 32.96500000 15.59800000  
C 12.86500000 31.74300000 15.59700000  
C 14.27300000 31.75000000 15.59800000  
C 14.98100000 32.96700000 15.60000000  
C 14.27100000 34.18400000 15.60100000  
C 12.86300000 34.18800000 15.59900000  
C 8.10917209 23.49902262 15.51977462  
C 8.72145784 24.55718628 15.53630550  
C 11.54567228 29.45693649 15.58720195  
C 12.15695613 30.51561965 15.59300276  
C 19.03500000 32.97100000 15.60000000  
C 19.75600000 31.75400000 15.60500000  
C 21.14300000 31.75500000 15.60400000  
C 21.86300000 32.97200000 15.59900000  
C 21.14200000 34.18900000 15.59400000  
C 19.75600000 34.18800000 15.59400000  
C 16.39834234 32.96828146 15.60035356  
C 17.62100000 32.97086369 15.60003832  
C 23.27703496 32.97201759 15.59850469  
C 24.49966334 32.96887393 15.59807049  
C 37.01687870 21.03964088 15.46511595  
C 38.23940245 21.04152732 15.45773639  
C 28.75129839 35.40217458 15.59162510  
C 29.36328887 36.46056244 15.58787786  
C 28.70909675 6.66258613 15.50416817  
C 29.31889208 5.60279584 15.50425204  
C 12.14100247 6.67166863 15.50781084  
C 11.53256345 5.61122176 15.50890191  
C 3.86117409 21.05768130 15.46154509  
C 2.63867107 21.05657760 15.45415350  
C 12.15389746 35.41487978 15.59623900  
C 11.54349682 36.47411603 15.59125172  
C 39.65300000 21.04500000 15.45200000  
C 40.37700000 19.83000000 15.44400000  
C 40.37000000 22.26500000 15.45500000  
C 5.05800000 19.83300000 15.44400000  
C 1.22500000 21.05300000 15.45000000  
C 0.50100000 22.26800000 15.45400000  
C 30.06800000 37.68600000 15.58200000  
C 31.48300000 37.70600000 15.58100000  
C 32.17300000 38.90800000 15.57400000  
C 31.47600000 40.13900000 15.56800000  
C 30.06200000 40.12000000 15.56900000  
C 29.37200000 38.91800000 15.57600000  
C 9.42300000 37.71600000 15.58400000  
C 10.83800000 37.69900000 15.58500000  
C 11.53200000 38.93200000 15.57900000  
C 10.84000000 40.13300000 15.57200000  
C 9.42500000 40.14900000 15.57100000  
C 8.73100000 38.91700000 15.57700000  
C 30.02500000 1.94500000 15.52200000  
C 31.43900000 1.92900000 15.52000000  
C 32.13300000 3.16200000 15.51300000  
C 31.44000000 4.36300000 15.50900000  
C 30.02500000 4.37800000 15.51200000  
C 29.33200000 3.14500000 15.51800000  
C 9.41400000 1.93600000 15.52200000  
C 10.82900000 1.95300000 15.52600000  
C 11.52100000 3.15400000 15.52100000  
C 10.82700000 4.38600000 15.51300000  
C 9.41200000 4.37000000 15.50900000  
C 8.72000000 3.16900000 15.51300000  
C 8.71898430 41.37402721 15.56471274  
C 8.10908170 42.43363713 15.55936184  
C 32.17954820 41.36554703 15.56219045  
C 32.78652812 42.42687903 15.55693024  
C 8.70727437 0.71092329 15.46726199  
C 8.11534614 47.33410037 15.59112553

2\_fix

C 32.14619280 0.70426581 15.46534626  
C 32.77597260 47.32751916 15.58940973  
C 5.99400000 43.66900000 15.55100000  
C 7.40200000 43.66200000 15.55200000  
C 8.10300000 44.88300000 15.54600000  
C 7.40500000 46.10700000 15.53900000  
C 5.99700000 46.10300000 15.53800000  
C 5.28600000 44.88700000 15.54500000  
C 33.49200000 43.65600000 15.54900000  
C 34.90100000 43.66500000 15.54800000  
C 35.60700000 44.88300000 15.54200000  
C 34.89500000 46.09800000 15.53700000  
C 33.48700000 46.10100000 15.53700000  
C 32.79100000 44.87700000 15.54300000  
C 3.86912799 44.88884572 15.54527406  
C 2.64659858 44.88953324 15.54366415  
C 37.02434064 44.88641294 15.54300845  
C 38.24696741 44.8881335 15.54319785  
C 0.51200000 43.67300000 15.54900000  
C 1.23300000 44.89000000 15.54300000  
C 0.51200000 46.10700000 15.53800000  
C 40.38200000 43.67300000 15.54900000  
C 40.38100000 46.10700000 15.53700000  
C 39.66100000 44.89000000 15.54300000  
C 28.81722266 11.57239012 15.07546448  
C 29.25882352 12.59616853 15.84913886  
C 28.03667462 10.72086100 12.46714278  
H 29.01728702 12.53749792 16.91751583  
H 26.07248750 30.80309813 15.59237482  
H 29.82211595 32.94749872 15.58394566  
H 26.09051725 35.12254509 15.59978694  
H 28.25675669 26.99185037 15.56741351  
H 29.49382510 24.83572424 15.54940166  
H 33.23823673 26.98548015 15.54605886  
H 32.00148369 29.14017256 15.56570502  
H 31.69394144 21.02348630 15.51094112  
H 35.44100827 18.87528772 15.46283447  
H 35.42865001 23.19586622 15.49289108  
H 28.26954813 15.07448609 15.52810030  
H 32.01130102 12.91364785 15.50652033  
H 33.25155902 15.06511886 15.47497086  
H 29.51514480 17.22584253 15.49771744  
H 26.05004267 6.96430263 15.49882692  
H 29.79900714 9.10759569 15.43792584  
H 26.06588059 11.28220923 15.45027398  
H 19.18413348 6.97759008 15.52306431  
H 21.66942459 6.97729533 15.52119294  
H 21.67068153 11.29456712 15.50539061  
H 19.18506701 11.29594676 15.50538916  
H 11.05389848 9.11885489 15.49869140  
H 14.80124682 6.96936357 15.51463136  
H 14.78859357 11.2892375 15.49876031  
H 7.62074493 15.08979673 15.46695669  
H 8.85453134 12.93344441 15.47052601  
H 12.60125847 15.07919825 15.49695772  
H 11.36737373 17.23560377 15.49186277  
H 5.43814514 18.89618320 15.45750095  
H 9.18405654 21.04686842 15.51070694  
H 5.44785336 23.21557615 15.49133902  
H 7.64375424 27.00842288 15.55008511  
H 11.38356889 24.85273513 15.58893887  
H 12.62519337 27.00556057 15.58197867  
H 8.88427682 29.16114553 15.57305504  
H 11.07587596 32.96490216 15.59779434  
H 14.81837316 30.80727130 15.59675264  
H 14.81498982 35.12748279 15.60240403  
H 19.20717211 30.81199234 15.60939393  
H 21.69280828 30.81353861 15.60769274  
H 21.69104018 35.13088808 15.58963735  
H 19.20616146 35.12948173 15.58978051  
H 39.82992500 18.88695836 15.44032114

H 39.81807118 23.20513610 15.45965238  
H 1.05984846 18.89374172 15.43957701  
H 1.04832086 23.21095915 15.45730595  
H 32.02627259 36.76072295 15.58567318  
H 33.26322699 38.91584576 15.57336828  
H 29.51885541 41.06531994 15.56430566  
H 28.28173235 38.91051313 15.57658050  
H 8.88149213 36.76974168 15.58863081  
H 12.62228125 38.92628568 15.57974020  
H 11.38118655 41.07941087 15.56729837  
H 7.64073523 38.92268473 15.57618944

H 29.48420564 0.99830023 15.52010064  
H 33.22320741 3.15680043 15.50390297  
H 31.98056826 5.30974665 15.50123137  
H 28.24171719 3.14980733 15.51779363  
H 11.37054823 1.00675030 15.52564722  
H 12.61126267 3.15963973 15.52194372  
H 8.87082934 5.31638923 15.50066634  
H 7.62977665 3.16325607 15.50273839  
H 5.44835313 42.72647391 15.55730624  
H 9.19206523 44.88164635 15.55421791  
H 5.45357248 47.04684390 15.54002690

H 35.44748531 42.72294290 15.55401336  
H 35.43762718 47.04231531 15.54014456  
H 31.70187242 44.87473860 15.55083699  
H 1.06123230 42.73120419 15.55331197  
H 1.06147905 47.04866636 15.53368932  
H 39.83232140 42.73145473 15.55394697  
H 39.83181438 47.04879448 15.53274510  
H 27.09996261 11.28750361 12.52327025  
H 28.38067919 10.70218680 11.42492196  
H 27.88423564 9.69077054 12.81081376  
S 29.37399527 11.54950382 13.37709038

### H-CMP-G

C 22.804899216 20.948671341 15.000000000  
C 22.099323273 19.728710175 15.000000000  
C 22.796220779 18.503870010 15.000000000  
C 24.205377579 18.503368378 15.000000000  
C 24.917964935 19.718721390 15.000000000  
C 24.213991165 20.939157486 15.000000000  
C 18.139598846 12.709809303 15.000000000  
C 17.435947418 11.489145279 15.000000000  
C 18.149045944 10.273995399 15.000000000  
C 19.558300018 10.274966240 15.000000000  
C 20.254667282 11.500133514 15.000000000  
C 19.548650742 12.719806671 15.000000000  
C 22.090858459 17.277879715 15.000000000  
C 21.494323730 16.204326630 15.000000000  
C 20.839899063 15.025382042 15.000000000  
C 20.246067047 13.950329781 15.000000000  
C 8.682087898 12.699211121 15.000000000  
C 7.984247208 11.474880219 15.000000000  
C 8.688868523 10.254433632 15.000000000  
C 10.097981453 10.262982368 15.000000000  
C 10.803026199 11.482839584 15.000000000  
C 10.091282845 12.698763847 15.000000000  
C 16.021696091 11.485045433 15.000000000  
C 14.793622017 11.485513687 15.000000000  
C 13.445344925 11.485573769 15.000000000  
C 12.217271805 11.485806465 15.000000000  
C 4.014784813 20.917711258 15.000000000  
C 3.304607153 19.700868607 15.000000000  
C 4.010921955 18.481794357 15.000000000  
C 5.420021534 18.475185394 15.000000000  
C 6.123126984 19.696527481 15.000000000  
C 5.423923016 20.920059204 15.000000000  
C 7.976466656 13.925068855 15.000000000  
C 7.376730919 14.996845245 15.000000000  
C 6.718572140 16.173711777 15.000000000  
C 6.120837212 17.246601105 15.000000000  
C 8.680620274 29.142114639 15.000000000  
C 7.981212139 27.918676376 15.000000000  
C 8.684186935 26.697229385 15.000000000  
C 10.093347549 26.703645706 15.000000000

C 10.799962044 27.922597885 15.000000000  
C 10.089779854 29.139490128 15.000000000  
C 6.128081322 22.146781921 15.000000000  
C 6.727159977 23.218933105 15.000000000  
C 7.385138988 24.395942688 15.000000000  
C 7.983129025 25.468706131 15.000000000  
C 18.136989594 29.166925430 15.000000000  
C 17.432962418 27.946428299 15.000000000  
C 18.145730972 26.731109619 15.000000000  
C 19.554916382 26.731588364 15.000000000  
C 20.251714706 27.956470490 15.000000000  
C 19.546134949 29.176464081 15.000000000  
C 12.214241982 27.925334930 15.000000000  
C 13.442323685 27.929597855 15.000000000  
C 14.790615082 27.934974670 15.000000000  
C 16.018690109 27.940801620 15.000000000  
C 20.260566711 25.505693436 15.000000000  
C 20.857727051 24.432468414 15.000000000  
C 21.512744904 23.253803253 15.000000000  
C 22.107036591 22.178993225 15.000000000  
C 20.265373230 9.049815178 15.000000000  
C 26.332075119 19.713684082 15.000000000  
C 27.560104370 19.709640503 15.000000000  
C 7.990308762 9.024498940 15.000000000  
C 7.396515369 7.949408054 15.000000000  
C 1.890480876 19.703317642 15.000000000  
C 0.662446618 19.705915451 15.000000000  
C 7.976930618 30.369195938 15.000000000  
C 7.379628658 31.442367554 15.000000000  
C 20.244905472 30.406364441 15.000000000  
C 20.842166901 31.479562759 15.000000000  
C 22.823127747 4.500063419 15.000000000  
C 22.118984222 3.29760874 15.000000000  
C 22.817064285 2.055054903 15.000000000  
C 24.226234436 2.056200027 15.000000000  
C 24.937586695 3.272396451 15.000000000  
C 24.232280731 4.492127895 15.000000000  
C 20.866151810 7.978578568 15.000000000  
C 21.525150299 6.802065372 15.000000000  
C 22.123022079 5.729205132 15.000000000

C 6.742795944 6.770017624 15.000000000  
C 6.147837162 5.695567131 15.000000000  
C 4.030736923 2.030582190 15.000000000  
C 6.143412113 3.244658232 15.000000000  
C 5.444470882 4.468355656 15.000000000  
C 4.035307407 4.468374874 15.000000000  
C 3.324643135 3.249825239 15.000000000  
C 1.910409331 3.253264427 15.000000000  
C 0.682340860 3.258225918 15.000000000  
C 26.351835251 3.268306017 15.000000000  
C 27.579906464 3.263305902 15.000000000  
C 5.439913750 2.023482800 15.000000000  
C 6.140033722 0.794363260 15.000000000  
C 6.723408699 32.620414734 15.000000000  
C 22.111928940 0.828797162 15.000000000  
C 21.499954224 32.656749725 15.000000000  
H 21.010339737 19.732557297 15.000000000  
H 24.746231079 17.558202744 15.000000000  
H 24.761684418 21.880371094 15.000000000  
H 17.591659546 13.650886536 15.000000000  
H 17.608573914 9.328612328 15.000000000  
H 21.343654633 11.504534721 15.000000000  
H 6.895252228 11.471969604 15.000000000  
H 10.644877434 9.321310997 15.000000000  
H 10.632700920 13.643614769 15.000000000  
H 3.471890926 21.861703873 15.000000000  
H 3.465131760 17.539466858 15.000000000  
H 7.212110043 19.694702148 15.000000000  
H 6.892216206 27.916973114 15.000000000  
H 10.638875008 25.761163712 15.000000000  
H 10.632709503 30.083459854 15.000000000  
H 17.589313507 30.108154297 15.000000000  
H 17.604495376 25.785896301 15.000000000  
H 21.340703964 27.960445404 15.000000000  
H 21.029998779 3.281981230 15.000000000  
H 24.778921127 5.433965683 15.000000000  
H 7.232408047 3.242587090 15.000000000  
H 3.492825985 5.410607338 15.000000000  
H 24.768302917 1.111726522 15.000000000  
H 3.484736443 1.088381052 15.000000000

### Case 3 full

C 22.82563554 20.92552259 14.75222185  
C 22.16125376 19.68217975 14.77384865  
C 22.89714391 18.47952401 14.80415209  
C 24.30632604 18.52660803 14.81124125  
C 24.98075806 19.76500100 14.79014353  
C 24.23509746 20.96115055 14.75955715  
C 18.22984612 12.71871194 15.04717175  
C 17.49691324 11.51572593 15.09651907  
C 18.18205586 10.28408641 15.08511541  
C 19.58994910 10.24906424 15.02554909  
C 20.31459249 11.45768256 14.97678697  
C 19.63880716 12.69550856 14.98733440  
C 22.22304917 17.23376068 14.83291567  
C 21.63093645 16.15714241 14.86426561  
C 20.97118247 14.97963302 14.90223352  
C 20.36330886 13.91203084 14.93978421  
C 8.75646392 12.75220308 15.39717576  
C 8.04496837 11.53554428 15.41878654  
C 8.73349393 10.30532465 15.40564574  
C 10.14310785 10.29626297 15.37328268  
C 10.86343519 11.50793097 15.35180988  
C 10.16555869 12.73254289 15.36527708  
C 16.08252385 11.53478429 15.15715290  
C 14.85491981 11.52581303 15.20933030  
C 13.50648175 11.51543343 15.26340447  
C 12.27864632 11.50208858 15.30886392  
C 4.27858510 21.06587933 14.99195184  
C 3.52883200 19.87161771 15.00721480

C 4.19404746 18.63303262 15.11334458  
C 5.59872393 18.58607253 15.21164846  
C 6.33714620 19.78715247 15.21355195  
C 5.68422524 21.03058058 15.09985529  
C 8.06575919 13.98768250 15.39583462  
C 7.48051680 15.06785970 15.37778126  
C 6.84132037 16.25566811 15.34206456  
C 6.26406364 17.33926501 15.29436104  
C 8.60163020 29.23501919 14.83356494  
C 7.80631143 28.07856439 14.69096602  
C 8.39247999 26.81211978 14.53795337  
C 9.79315220 26.70549033 14.51833991  
C 10.60730184 27.85103146 14.67018555  
C 10.00473984 29.11548038 14.82598669  
C 6.43674062 22.23421957 15.09558221  
C 7.07309389 23.28139635 15.08002561  
C 8.82631727 24.46615841 15.11491672  
C 7.53624232 25.60941537 14.41677709  
C 17.92788557 20.91955070 14.73445760  
C 17.24489847 27.78649619 14.69702305  
C 17.98152798 26.58405415 14.68509338  
C 19.39103093 26.60884174 14.71178327  
C 20.06389116 27.84734864 14.74873898  
C 19.33725726 29.05595196 14.76060038  
C 12.02046442 27.75414697 14.65588131  
C 13.24967187 27.73449092 14.6557938  
C 14.59984196 27.73534609 14.66323431  
C 15.82878037 27.75507833 14.67616590

C 20.12402430 25.39686600 14.70642455  
C 20.75562817 24.34260400 14.70899080  
C 21.45120619 23.18558354 14.71725742  
C 22.08518300 22.13282025 14.72968253  
C 20.25887073 9.00088168 15.01661265  
C 26.39632081 19.80822685 14.80780697  
C 27.62449969 19.84559092 14.83482283  
C 8.01199776 9.08691132 15.41555182  
C 7.38295541 8.03131607 15.41301125  
C 2.11483508 19.90075800 14.92660908  
C 0.88686623 19.88489960 14.87696224  
C 7.98320473 30.50111096 14.97009094  
C 7.41168493 31.58498254 15.06240093  
C 20.02114796 30.29623327 14.80156854  
C 20.62290689 31.36738035 14.83927816  
C 22.64025145 4.35246683 15.01544479  
C 21.92846998 3.13638349 14.96717678  
C 22.61721399 1.90547679 14.97236860  
C 24.02674695 1.89644015 15.02649980  
C 24.74698119 3.10724769 15.07503643  
C 24.04858724 4.33154747 15.06918551  
C 20.80520137 7.90014958 15.01256933  
C 21.41043883 6.69366967 15.01751556  
C 21.96031031 5.59468867 15.01110703  
C 6.69818106 6.86829711 15.40051150  
C 6.07920090 5.80696483 15.37962377  
C 4.02636345 2.10581720 15.24371500  
C 6.11186557 3.36219582 15.30874174

C 5.38785316 4.57176876 15.34203520  
C 3.97827978 4.54035058 15.32707099  
C 3.29296390 3.30909832 15.27673929  
C 1.87765712 3.27218513 15.24974023  
C 0.65054637 3.21699143 15.21561832  
C 26.16203188 3.10943656 15.12813884  
C 27.38926918 3.15387632 15.17229664  
C 5.43579121 2.12684454 15.25762713  
C 6.15997071 0.91165959 15.20750144  
C 6.76571800 32.76662242 15.14678106  
C 21.90096826 0.68385470 14.92380261  
C 21.28959550 32.54098024 14.88270569  
C 6.51927358 26.62056107 12.00123587  
H 21.07270484 19.65016244 14.76968585

H 24.87819406 17.60011629 14.83614025  
H 24.75166679 21.91976871 14.74468763  
H 17.70516006 13.67298231 15.05572970  
H 17.61966609 9.35231702 15.12314882  
H 21.40244657 11.43554140 14.93083766  
H 6.95622540 11.54574999 15.44154420  
H 10.67812281 9.34780637 15.36107177  
H 10.71889236 13.67032246 15.34661810  
H 3.76864998 22.02430573 14.90453326  
H 3.61901738 17.70826165 15.11817662  
H 7.42282713 19.75305799 15.29327648  
H 6.71955999 28.16602151 14.71669067  
H 10.26449486 25.73447563 14.36479126  
H 10.62720892 30.00280899 14.93223284

H 17.36258978 29.95033898 14.74457585  
H 17.45819348 25.62939994 14.65730930  
H 21.15247131 27.87084114 14.77011556  
H 20.84026952 3.14699336 14.92547365  
H 24.60152442 5.26898676 15.10649143  
H 7.20064049 3.38364050 15.31774555  
H 3.41586494 5.47262918 15.35043944  
H 24.56133605 0.94764243 15.03078797  
H 3.50031899 1.15316735 15.20276377  
H 6.85066025 27.63849180 12.23665224  
H 7.29733475 26.08365889 11.44646255  
H 5.60959547 26.67114918 11.38979738  
H 8.68131971 24.48733720 15.79835283  
S 6.03627209 25.68768861 13.48888711

### Case 3 fix

C 22.80500000 20.94900000 15.00000000  
C 22.09900000 19.72900000 15.00000000  
C 22.79600000 18.50400000 15.00000000  
C 24.20500000 18.50300000 15.00000000  
C 24.91800000 19.71900000 15.00000000  
C 24.21400000 20.93900000 15.00000000  
C 18.14000000 12.71000000 15.00000000  
C 17.43600000 11.48900000 15.00000000  
C 18.14900000 10.27400000 15.00000000  
C 19.55800000 10.27500000 15.00000000  
C 20.25500000 11.50000000 15.00000000  
C 19.54900000 12.72000000 15.00000000  
C 22.09033280 17.27825519 15.00016457  
C 21.49409161 16.20459265 15.00018237  
C 20.83970723 15.02569613 15.00005985  
C 20.24649035 13.95036195 15.00006657  
C 8.68200000 12.69900000 15.00000000  
C 7.98400000 11.47500000 15.00000000  
C 8.68900000 10.25400000 15.00000000  
C 10.09800000 10.26300000 15.00000000  
C 10.80300000 11.48300000 15.00000000  
C 10.09100000 12.69900000 15.00000000  
C 16.02174314 11.48517863 14.99882463  
C 14.79364513 11.48549150 14.99781230  
C 13.44534764 11.48549340 14.99742931  
C 12.21724630 11.48577875 14.99865998  
C 4.01500000 20.91800000 15.00000000  
C 3.30500000 19.70100000 15.00000000  
C 4.01100000 18.48200000 15.00000000  
C 5.42000000 18.47500000 15.00000000  
C 6.12300000 19.69700000 15.00000000  
C 5.42400000 20.92000000 15.00000000  
C 7.97650877 13.92494614 15.00050365  
C 7.37744751 14.99712615 15.00086587  
C 6.71921601 16.17392758 15.00086099  
C 6.12051439 17.24636208 15.00150729  
C 8.68100000 29.14200000 15.00000000  
C 7.98100000 27.91900000 15.00000000  
C 8.68400000 26.69700000 15.00000000  
C 10.09300000 26.70400000 15.00000000  
C 10.80000000 27.92300000 15.00000000  
C 10.09000000 29.13900000 15.00000000

C 6.17421358 22.16455479 15.09203168  
C 6.84453009 23.19630294 15.20768626  
C 7.63601695 24.35765605 15.50509338  
C 7.87527229 25.43959063 14.69024765  
C 18.13700000 29.16700000 15.00000000  
C 17.43300000 27.94600000 15.00000000  
C 18.14600000 26.73100000 15.00000000  
C 19.55500000 26.73200000 15.00000000  
C 20.25200000 27.95600000 15.00000000  
C 19.54600000 29.17600000 15.00000000  
C 12.21405643 27.92620554 14.99397732  
C 13.44240690 27.92922422 14.99213012  
C 14.79063108 27.93467708 14.99296556  
C 16.01879146 27.94031972 14.99543718  
C 20.26038370 25.50582694 14.99855860  
C 20.85705386 24.43234323 14.99926061  
C 21.51231144 23.25381282 14.99984050  
C 22.10703021 22.17924724 14.99960468  
C 20.26483477 9.04960594 14.99980277  
C 26.33213499 19.71320650 15.00179085  
C 27.56023201 19.70624976 15.00773835  
C 7.99059200 9.02397814 15.00039637  
C 7.39711318 7.94886892 15.00040684  
C 1.89078265 19.70415992 15.00516660  
C 0.66265404 19.71073282 15.00821837  
C 7.98089577 30.36918874 14.99808942  
C 7.38580272 31.44292519 14.99716112  
C 20.24662809 30.40715009 15.00024360  
C 20.84684240 31.47948260 15.00043476  
C 22.82300000 4.50000000 15.00000000  
C 22.11900000 3.27900000 15.00000000  
C 22.81700000 2.05500000 15.00000000  
C 24.22600000 2.05600000 15.00000000  
C 24.93800000 3.27200000 15.00000000  
C 24.23200000 4.49200000 15.00000000  
C 20.86547780 7.97829314 14.99972621  
C 21.52439605 6.80168629 14.99978240  
C 22.12257680 5.72899328 14.99989777  
C 6.74299151 6.76946305 15.00041125  
C 6.14748376 5.69530685 14.99902648  
C 4.03100000 2.03100000 15.00000000  
C 6.14300000 3.24500000 15.00000000

C 5.44400000 4.46800000 15.00000000  
C 4.03500000 4.46600000 15.00000000  
C 3.32500000 3.25000000 15.00000000  
C 1.91064023 3.25396664 15.00071415  
C 0.68259847 3.26187858 15.00074998  
C 26.35211111 3.26693692 15.00036635  
C 27.58016533 3.25922200 15.00071877  
C 5.44000000 2.02300000 15.00000000  
C 6.13875789 0.79555917 14.99877798  
C 6.73267263 32.62102878 14.99726588  
C 22.11000499 0.82751703 15.00049139  
C 21.50817058 32.65631994 15.00079015  
C 8.12714148 26.35716762 12.01580982  
H 21.01003175 19.73294064 15.00003423  
H 24.74606720 17.55798185 15.00021723  
H 24.76187306 21.88013772 15.00014831  
H 17.59195024 13.65100692 14.99986937  
H 17.60838729 9.32868952 14.99983920  
H 21.34396649 11.50401456 14.99996663  
H 6.89503123 11.47212411 15.00009715  
H 10.64521119 9.32148832 14.99992148  
H 10.63227012 13.64391286 14.99989102  
H 3.47239907 21.86217506 15.01054337  
H 3.46492043 17.53979459 15.00295417  
H 7.21187337 19.69604596 15.00966723  
H 6.89212940 27.91707576 14.95913282  
H 10.64131851 25.76259129 14.96051919  
H 10.63328718 30.08285534 14.98926630  
H 17.58935817 30.10823223 14.99951245  
H 17.60550495 25.78563709 14.99937099  
H 21.34095571 27.95998754 14.99973622  
H 21.03001246 3.28173001 15.00011236  
H 24.77864475 5.43384887 15.00007510  
H 7.23200708 3.24328452 14.99992317  
H 3.49253222 5.41024044 15.00005513  
H 24.76790277 1.11141860 15.00017113  
H 3.48468344 1.08893901 15.00011785  
H 8.27549582 27.39919001 12.32234458  
H 9.08997689 25.84190664 11.92177396  
H 7.61482041 26.33882132 11.04529911  
H 8.04760643 24.39105074 16.52003518  
S 7.01324035 25.46139116 13.13978500

### Case 4 full

C 23.028009415 20.531003952 14.993452072  
C 22.342130661 19.299863815 14.998478889  
C 23.055503845 18.084201813 14.989764214  
C 24.464847565 18.103775024 14.976209641  
C 25.160243988 19.330106735 14.971323967  
C 24.437517166 20.540807724 14.979764938  
C 18.243658066 12.403671265 15.003913879  
C 17.514541626 11.196805954 15.006637573  
C 18.203977585 9.966763496 15.014226913  
C 19.613592148 9.939969063 15.018775940  
C 20.332923889 11.152333260 15.016211510  
C 19.652887344 12.386473656 15.008674622  
C 22.352914810 16.855588913 14.995074272  
C 21.720956802 15.802087784 14.998876572  
C 21.023262024 14.647374153 15.002812386  
C 20.383226395 13.598776817 15.006301880  
C 8.813087463 12.784045219 14.962898254  
C 8.063139915 11.589040756 14.964609146  
C 8.713109016 10.337825775 14.973014832  
C 10.122377396 10.287716866 14.978925705  
C 10.881123543 11.475589752 14.977591515  
C 10.221616745 12.721673012 14.969604492  
C 16.098802567 11.229722977 15.002161980

C 14.871210098 11.285436630 14.998011589  
C 13.522951126 11.349272728 14.993400574  
C 12.295808792 11.413294792 14.985944748  
C 3.920174122 20.860343933 14.918787003  
C 3.313949347 19.588510513 14.927808762  
C 4.124318123 18.436500549 14.934403419  
C 5.530392647 18.553062439 14.934174538  
C 6.126057625 19.832252502 14.927251816  
C 5.324041843 20.991998672 14.918521881  
C 8.156394005 14.039539337 14.955565453  
C 7.584144592 15.127392761 14.949933052  
C 6.930016518 16.308773041 14.943906784  
C 6.316773415 17.374156952 14.938596725  
C 8.802713394 28.879314423 15.023215294  
C 8.05895657 27.679647446 15.018531799  
C 8.698472977 26.421020508 15.013595581  
C 10.112138748 26.402236938 15.027392387  
C 10.870480537 27.588424683 15.028655052  
C 10.209511757 28.834491730 15.024024963  
C 18.232398987 28.680498123 15.034925461  
C 17.510520935 27.468765259 15.032025337  
C 18.209535599 26.243942261 15.027547836  
C 19.618959427 26.226213455 15.026071548

C 20.330656052 27.442724228 15.029329300  
C 19.642160416 28.672498703 15.033829689  
C 12.286382675 27.538610458 15.032546043  
C 13.515294075 27.514812469 15.035952568  
C 14.865292549 27.494541168 15.035369873  
C 16.094326019 27.481712341 15.033978462  
C 20.324440002 24.998823166 15.021598816  
C 20.959892273 23.947254181 15.016232491  
C 21.660074234 22.793762202 15.009321213  
C 22.301984787 21.746131897 15.002366066  
C 20.315448761 8.710505486 15.025299072  
C 26.576007843 19.349637985 14.958971024  
C 27.804450989 19.378553391 14.949591637  
C 7.968865395 9.132324219 14.980079651  
C 7.359137535 8.065093994 14.986918449  
C 1.901936293 19.482770920 14.931278229  
C 0.674381495 19.426548004 14.940793037  
C 8.127655983 30.125650406 15.028624535  
C 7.527386665 31.198371887 15.032012939  
C 20.370508194 29.886743546 15.038015366  
C 21.023290634 30.927782059 15.040642738  
C 23.059621811 4.267238617 15.045414925  
C 22.379226685 3.033112764 15.046012878

C 23.097690582 1.820295930 15.045570374  
C 24.507268906 1.846896410 15.044558525  
C 25.197921753 3.076602936 15.044936180  
C 24.469152451 4.283993721 15.045615196  
C 20.959751129 7.664304733 15.030396461  
C 21.670995712 6.517548561 15.035566330  
C 22.325309753 5.477606297 15.040156364  
C 6.699915886 6.886706352 14.999260902  
C 6.112688541 5.806996822 15.010462761  
C 4.103162766 2.078593969 15.037429810  
C 6.176219940 3.356940031 15.025518417  
C 5.440130711 4.560075760 15.021999359  
C 4.030896664 4.514002323 15.026575089  
C 3.357571840 3.275153637 15.033981323  
C 1.941614389 3.230800629 15.036032677  
C 0.713307083 3.186978817 15.037840843  
C 26.614255905 3.104138851 15.042071342  
C 27.842758179 3.142424583 15.039674759  
C 5.513124466 2.112475872 15.033347130

C 6.250372887 0.902813554 15.035732269  
C 6.856610298 32.370395660 15.033267975  
C 22.394794464 0.591198921 15.044641111  
C 21.734640121 32.074691772 15.043410301  
C 5.888605118 22.295072556 14.905930519  
C 6.298999310 23.449527740 14.893702507  
C 6.691585541 24.804267883 14.869561195  
C 8.020911217 25.135948181 15.002464294  
C 3.904274702 24.999168396 14.429543495  
H 21.253259659 19.287420273 15.009296417  
H 25.019571304 17.166666031 14.969777107  
H 24.971935272 21.489662170 14.976066589  
H 17.713916779 13.355129242 14.998160362  
H 17.644474030 9.032434464 15.016316414  
H 21.421791077 11.134521484 15.019918442  
H 6.975013256 11.633893013 14.960395813  
H 10.628237724 9.323339462 14.985906601  
H 10.803795815 13.642045975 14.968377113  
H 3.293302774 21.750757217 14.913553238

H 3.664540768 17.449378967 14.940078735  
H 7.211390018 19.923042297 14.926615715  
H 6.974954605 27.758657455 15.034117699  
H 10.635918617 25.445402145 15.031675339  
H 10.786262512 29.758144379 15.024724960  
H 17.696569443 29.628610611 15.038623810  
H 17.656423569 25.305820465 15.025325775  
H 21.419569016 27.432401657 15.028499603  
H 21.290355682 3.015984535 15.045749664  
H 24.999334335 5.235249043 15.044819832  
H 7.264836788 3.389250517 15.021325111  
H 3.459086418 5.440824509 15.024032593  
H 25.066581726 0.912447989 15.043305397  
H 3.586346626 1.120018005 15.044735909  
H 8.684310913 24.274263382 15.105546951  
H 3.993523121 24.347829819 13.552944183  
H 3.677371264 24.415287018 15.328490257  
H 3.105293036 25.732288361 14.259948730  
S 5.393662453 26.005361557 14.657816887

### Case 4\_fix

C 22.80500000 20.94900000 15.00000000  
C 22.09900000 19.72900000 15.00000000  
C 22.79600000 18.50400000 15.00000000  
C 24.20500000 18.50300000 15.00000000  
C 24.91800000 19.71900000 15.00000000  
C 24.21400000 20.93900000 15.00000000  
C 18.14000000 12.71000000 15.00000000  
C 17.43600000 11.48900000 15.00000000  
C 18.14900000 10.27400000 15.00000000  
C 19.55800000 10.27500000 15.00000000  
C 20.25500000 11.50000000 15.00000000  
C 19.54900000 12.72000000 15.00000000  
C 22.09054766 17.27812333 14.99999978  
C 21.49436618 16.20444131 14.99999969  
C 20.84003936 15.02551219 14.99999978  
C 20.24649866 13.95036731 14.99999986  
C 8.68200000 12.69900000 15.00000000  
C 7.98400000 11.47500000 15.00000000  
C 8.68900000 10.25400000 15.00000000  
C 10.09800000 10.26300000 15.00000000  
C 10.80300000 11.48300000 15.00000000  
C 10.09100000 12.69900000 15.00000000  
C 16.02174211 11.48522560 15.00000010  
C 14.79365002 11.48550650 15.00000019  
C 13.44535453 11.48558569 15.00000022  
C 12.21726183 11.48598689 15.00000012  
C 4.01500000 20.91800000 15.00000000  
C 3.30500000 19.70100000 15.00000000  
C 4.01100000 18.48200000 15.00000000  
C 5.42000000 18.47500000 15.00000000  
C 6.12300000 19.69700000 15.00000000  
C 5.42400000 20.92000000 15.00000000  
C 7.97648498 13.92506841 15.00000778  
C 3.73730291 14.99714809 15.00001355  
C 6.71921582 16.17408973 15.00000990  
C 6.12162753 17.24706819 15.00000694  
C 8.68100000 29.14200000 15.00000000  
C 7.98100000 27.91900000 15.00000000  
C 8.68400000 26.69700000 15.00000000  
C 10.09300000 26.70400000 15.00000000  
C 10.80000000 27.92300000 15.00000000  
C 10.09000000 29.13900000 15.00000000

C 18.13700000 29.16700000 15.00000000  
C 17.43300000 27.94600000 15.00000000  
C 18.14600000 26.73100000 15.00000000  
C 19.55500000 26.73200000 15.00000000  
C 20.25200000 27.95600000 15.00000000  
C 19.54600000 29.17600000 15.00000000  
C 12.21449175 27.92786377 15.00000014  
C 13.44267156 27.93171733 15.00000025  
C 14.79089506 27.93628371 15.00000017  
C 16.01899575 27.94069353 15.00000009  
C 20.26070649 25.50600754 15.00000017  
C 20.85773246 24.43271940 15.00000020  
C 21.51296283 23.25415837 15.00000017  
C 22.10730412 22.17936669 15.00000014  
C 20.26486353 9.04962648 14.99999977  
C 26.33213946 19.71348722 14.99999936  
C 27.56020703 19.70716187 14.99999950  
C 7.99037094 9.02411385 14.99999994  
C 7.39655049 7.94901034 14.99999987  
C 1.89079161 19.70482572 14.99999978  
C 0.66264247 19.71154320 14.99999959  
C 7.98070524 30.36871492 15.00000367  
C 7.38602030 31.44269945 15.00000370  
C 20.24693235 30.40699108 14.99999994  
C 20.84691058 31.47944726 14.99999989  
C 22.82300000 4.50000000 15.00000000  
C 22.11900000 3.27900000 15.00000000  
C 22.81700000 2.05500000 15.00000000  
C 24.22600000 2.05600000 15.00000000  
C 24.93800000 3.27200000 15.00000000  
C 24.23200000 4.49200000 15.00000000  
C 20.86530890 7.97820103 14.99999968  
C 21.52437817 6.80168747 14.99999978  
C 22.12263525 5.72904288 14.99999986  
C 6.74250428 6.76974038 14.99999979  
C 6.14717248 5.69548449 14.99999987  
C 4.03100000 2.03100000 15.00000000  
C 6.14300000 3.24500000 15.00000000  
C 5.44400000 4.46800000 15.00000000  
C 4.03500000 4.46600000 15.00000000  
C 3.32500000 3.25000000 15.00000000  
C 1.91066228 3.25404439 15.00000000

C 0.68260758 3.26174447 15.00000000  
C 26.35210510 3.26708429 15.00000001  
C 27.58017106 3.25905261 15.00000001  
C 5.44000000 2.02300000 15.00000000  
C 6.13888741 0.79553846 15.00000197  
C 6.73266348 32.62075411 15.00000395  
C 22.11010843 0.82745338 14.99999992  
C 21.50813242 32.65636334 14.99999985  
C 6.07945014 22.22271982 14.99748077  
C 6.51330550 23.38187776 14.99400739  
C 6.81874205 24.78929448 14.98589831  
C 8.09930085 25.31952101 15.00295386  
C 3.96343413 24.81151924 14.93525738  
H 21.01003849 19.73306126 15.00000173  
H 24.74583743 17.55784801 15.00000441  
H 24.76143290 21.88038021 15.00002137  
H 17.59192892 13.65099593 15.00000035  
H 17.60845681 9.32864472 15.00000035  
H 21.34396529 11.50394339 15.00000088  
H 6.89503130 11.47180002 15.00000236  
H 10.64511893 9.32143926 15.00000066  
H 10.63248946 13.64378794 15.00000169  
H 3.46681771 21.85768125 15.00022809  
H 3.46506126 17.53979231 14.99996527  
H 7.21207779 19.69382722 14.99969050  
H 6.89393312 27.93806090 15.00185053  
H 10.64721099 25.76615120 15.00049075  
H 10.63330331 30.08287315 14.99991789  
H 17.58906656 30.10805420 14.99999971  
H 17.60517385 25.78583313 14.99999870  
H 21.34094801 27.96015670 15.00000678  
H 21.03001071 3.28166400 15.00000089  
H 24.77872945 5.43379422 15.00000124  
H 7.23200189 3.24291058 15.00000187  
H 3.49248958 5.41021220 14.99999990  
H 24.76791410 1.11142599 15.00000556  
H 3.48496948 1.08879808 15.00000843  
H 8.87264099 24.54727494 15.02104392  
H 3.94673291 24.17695639 14.04202242  
H 3.90936891 24.20785907 15.84825368  
H 3.11074211 25.50224500 14.90584571  
S 5.41408824 25.89286865 14.94720696

Fig. S10 XRD patterns of H-CMP-1, H-CMP-Br, H-CMP-G, H-CMP-1-PT, H-CMP-Br-PT, and H-CMP-G-PT.

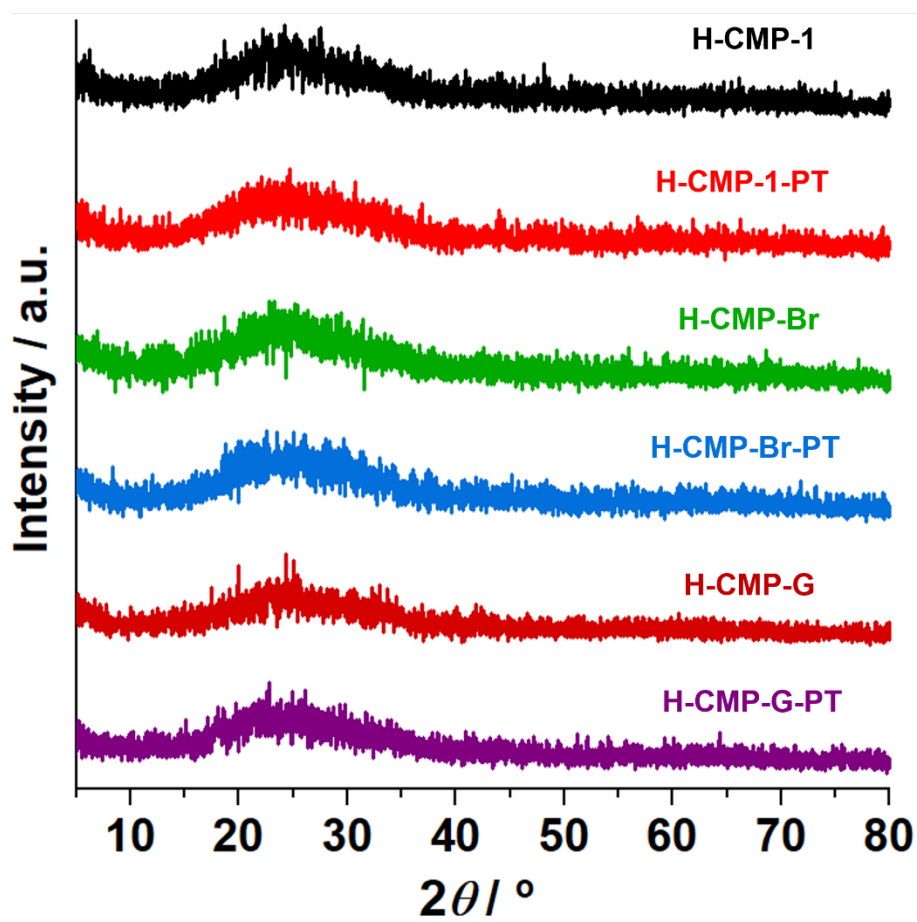

Supplement: d3py00227f1.pdf [file d3py00227f1.pdf]
